# Supplementary material for: OTX2 Activity at Distal Regulatory Elements Shapes the Chromatin Landscape of Group 3 Medulloblastoma
Source: Oxford University Press journal article supplement (doi:10.1158/2159-8290.cd-16-0844), 2017-02-18
Supplement: 21598290cd160844-sup-169828_2_supp_3788636_22dtfx.xlsx [file 21598290cd160844-sup-169828_2_supp_3788636_22dtfx.xlsx]

## Sheet: TableS1.txt
chr	peak_start	peak_end	peak_id	Nearest Gene
1	19777	21096	1	DDX11L1
1	32404	35080	2	FAM138A
1	37081	38418	3	FAM138A
1	868203	869514	4	SAMD11
1	874648	877767	5	SAMD11
1	878464	878488	6	NOC2L
1	879613	881172	7	NOC2L
1	1238511	1242268	8	ACAP3
1	1440614	1441606	9	ATAD3A
1	1757839	1759619	10	NADK
1	1763864	1764867	11	NADK
1	1777921	1779511	12	GNB1
1	2087587	2089238	13	FAAP20
1	2120529	2122134	14	FAAP20
1	2145159	2145454	15	FAAP20
1	2395713	2397897	16	PLCH2
1	2399898	2406753	17	PLCH2
1	2408754	2409709	18	PLCH2
1	2474329	2478031	19	TNFRSF14
1	3737288	3738936	20	LRRC47
1	5355697	5357710	21	AJAP1
1	5371295	5372197	22	AJAP1
1	5977953	5978326	23	KCNAB2
1	6061627	6065067	24	NPHP4
1	7008548	7010206	25	CAMTA1
1	7186229	7188264	26	CAMTA1
1	7520807	7521832	27	VAMP3
1	7538209	7539448	28	VAMP3
1	7739756	7743075	29	VAMP3
1	7828515	7829869	30	VAMP3
1	8228972	8230701	31	LOC102724539
1	8432710	8435702	32	RERE
1	8481988	8482746	33	RERE
1	8522457	8525104	34	SNORD128
1	8563271	8565178	35	SNORD128
1	8574756	8588137	36	SNORD128
1	8589573	8590548	37	SNORD128
1	8596149	8597205	38	SNORD128
1	8619821	8625547	39	SNORD128
1	8625935	8632727	40	SNORD128
1	8637430	8639327	41	SNORD128
1	8645937	8647653	42	SNORD128
1	8656266	8662340	43	SNORD128
1	8680533	8683536	44	SNORD128
1	8688653	8689674	45	SNORD128
1	8695205	8695819	46	SNORD128
1	8720968	8722829	47	RERE
1	8741288	8742651	48	RERE
1	8746928	8748939	49	RERE
1	8772263	8773490	50	RERE
1	8824338	8825960	51	RERE
1	8841281	8843035	52	RERE
1	8861945	8862784	53	RERE
1	8878699	8879783	54	RERE
1	9434519	9436082	55	LOC100506022
1	9565277	9566123	56	SLC25A33
1	9612432	9612719	57	SLC25A33
1	9618110	9623567	58	SLC25A33
1	9651135	9655804	59	TMEM201
1	9857555	9859912	60	CLSTN1
1	9885692	9886985	61	CLSTN1
1	9896118	9896921	62	CLSTN1
1	9899565	9905247	63	CLSTN1
1	9906719	9907566	64	CLSTN1
1	9911990	9913841	65	CLSTN1
1	9971316	9971486	66	CTNNBIP1
1	10081590	10083008	67	UBE4B
1	10269107	10269763	68	KIF1B
1	10285711	10286969	69	KIF1B
1	10308935	10316117	70	KIF1B
1	10316848	10318004	71	RNU6-2
1	10531365	10531612	72	DFFA
1	10596786	10598974	73	PEX14
1	10700181	10701285	74	CASZ1
1	10736021	10743824	75	CASZ1
1	10784504	10786969	76	CASZ1
1	10793180	10795629	77	CASZ1
1	10810954	10815106	78	CASZ1
1	10816335	10817253	79	CASZ1
1	10848576	10851946	80	CASZ1
1	10910984	10911795	81	CASZ1
1	11207459	11208574	82	MTOR-AS1
1	11274751	11276351	83	ANGPTL7
1	11296927	11299252	84	MTOR
1	11400142	11400387	85	UBIAD1
1	11534414	11535890	86	DISP3
1	11547025	11548063	87	DISP3
1	11758337	11761925	88	DRAXIN
1	11901376	11901687	89	NPPA-AS1
1	15944953	15945390	90	DDI2
1	16169983	16170860	91	SPEN
1	16212237	16213628	92	FLJ37453
1	16441999	16443508	93	EPHA2
1	16477197	16481581	94	EPHA2
1	16533167	16533921	95	ARHGEF19
1	16575206	16575706	96	RSG1
1	16821816	16823002	97	CROCCP3
1	17111314	17112224	98	MST1L
1	17240084	17244784	99	CROCC
1	17246997	17247444	100	CROCC
1	17292999	17295116	101	MFAP2
1	17358068	17358640	102	ATP13A2
1	17370162	17373191	103	SDHB
1	17463261	17464385	104	PADI2
1	18416998	18418475	105	IGSF21
1	18460809	18461728	106	IGSF21
1	18475482	18476405	107	IGSF21
1	18502100	18503427	108	IGSF21
1	18509894	18511408	109	IGSF21
1	18513465	18514601	110	IGSF21
1	18514900	18527574	111	IGSF21
1	18530113	18530861	112	IGSF21
1	18536586	18538641	113	IGSF21
1	18551294	18552823	114	IGSF21
1	18582550	18583924	115	IGSF21
1	18670017	18672278	116	KLHDC7A
1	18861682	18862597	117	KLHDC7A
1	19449833	19451119	118	UBR4
1	19452854	19455415	119	UBR4
1	19565208	19569358	120	EMC1
1	19687836	19689146	121	PQLC2
1	19715743	19718776	122	PQLC2
1	19730825	19733199	123	CAPZB
1	19740567	19742193	124	CAPZB
1	20204544	20205257	125	OTUD3
1	20651757	20653225	126	VWA5B1
1	20712676	20713966	127	LINC01141
1	21912665	21913445	128	RAP1GAP
1	22533769	22536114	129	WNT4
1	22538266	22540219	130	WNT4
1	22779344	22779651	131	ZBTB40
1	22814367	22814653	132	ZBTB40
1	22830973	22832245	133	ZBTB40
1	22833203	22833289	134	ZBTB40
1	22833972	22834762	135	EPHA8
1	22907215	22911276	136	EPHA8
1	22931227	22931463	137	C1QA
1	22932404	22934841	138	C1QA
1	22937864	22941687	139	C1QA
1	23003410	23003927	140	C1QB
1	23241442	23246057	141	LACTBL1
1	23294490	23300727	142	LACTBL1
1	23635053	23639443	143	LINC01355
1	23697357	23698041	144	ZNF436
1	24246314	24247606	145	CNR2
1	24283066	24284091	146	PNRC2
1	24285115	24285300	147	PNRC2
1	24877590	24880478	148	LOC100506985
1	26069486	26070760	149	SEPN1
1	26222235	26223065	150	STMN1
1	26234368	26234461	151	STMN1
1	26253710	26254577	152	STMN1
1	26254611	26254934	153	STMN1
1	26279072	26280441	154	PAFAH2
1	26325648	26326736	155	PAFAH2
1	27049184	27049989	156	ARID1A
1	27112896	27113453	157	PIGV
1	27158658	27162455	158	ZDHHC18
1	27625476	27628136	159	TMEM222
1	27632916	27635158	160	TMEM222
1	27635957	27636718	161	TMEM222
1	27736732	27738021	162	GPR3
1	27845536	27846348	163	WASF2
1	27862307	27864713	164	WASF2
1	27871506	27871853	165	WASF2
1	27886347	27888933	166	AHDC1
1	27915754	27922806	167	AHDC1
1	28970604	28971362	168	TAF12
1	28973837	28974111	169	RNU11
1	28976112	28976508	170	RNU11
1	29159571	29160534	171	OPRD1
1	29225313	29226065	172	EPB41
1	29355779	29356558	173	TMEM200B
1	29376570	29376942	174	TMEM200B
1	29536354	29538933	175	MECR
1	29779198	29779770	176	LOC101928460
1	29841205	29842157	177	LOC101928460
1	30155261	30156230	178	LOC101929406
1	32135281	32136277	179	PEF1
1	32137105	32139832	180	PEF1
1	32264063	32264951	181	SPOCD1
1	32526578	32529579	182	TMEM39B
1	32666987	32667065	183	CCDC28B
1	33209131	33210137	184	KIAA1522
1	33284633	33284867	185	YARS
1	33346688	33350461	186	HPCA
1	33648671	33648873	187	TRIM62
1	33720961	33721173	188	ZNF362
1	33799093	33814498	189	PHC2
1	33821047	33833032	190	LOC101929464
1	33891862	33894980	191	ZSCAN20
1	35964200	35966462	192	KIAA0319L
1	36172730	36174882	193	C1orf216
1	36192742	36194087	194	C1orf216
1	36616115	36617152	195	TRAPPC3
1	36620431	36620565	196	MAP7D1
1	36669031	36670396	197	THRAP3
1	36688955	36689012	198	THRAP3
1	36705708	36706565	199	THRAP3
1	36830762	36832295	200	STK40
1	36838124	36840814	201	STK40
1	36852528	36853304	202	STK40
1	36942271	36942534	203	CSF3R
1	38274865	38275228	204	YRDC
1	38485895	38486531	205	UTP11
1	38517918	38518474	206	POU3F1
1	39598342	39599296	207	MACF1
1	39623586	39625104	208	MACF1
1	39630683	39631159	209	MACF1
1	39633745	39640813	210	MACF1
1	39733756	39736192	211	KIAA0754
1	39759016	39759405	212	KIAA0754
1	39860616	39861863	213	KIAA0754
1	39890557	39891072	214	KIAA0754
1	39923994	39925413	215	BMP8A
1	40501716	40503158	216	CAP1
1	40551867	40553663	217	PPT1
1	41123899	41125705	218	RIMS3
1	41779492	41782041	219	FOXO6
1	41792814	41794081	220	FOXO6
1	41795638	41797643	221	FOXO6
1	41830242	41833341	222	FOXO6
1	41836698	41838736	223	LOC101929901
1	41845732	41847347	224	LOC101929901
1	41852761	41854179	225	LOC101929901
1	41947732	41949095	226	EDN2
1	42180190	42181470	227	HIVEP3
1	42884259	42889794	228	ZMYND12
1	43108402	43111326	229	PPIH
1	43318523	43319435	230	LOC339539
1	43418641	43419798	231	SLC2A1-AS1
1	43547413	43553485	232	FAM183A
1	43847440	43848202	233	MED8
1	44181748	44183346	234	ST3GAL3
1	44264410	44266478	235	LOC101929592
1	44277445	44278954	236	LOC101929592
1	44378135	44379518	237	ARTN
1	44417099	44419498	238	IPO13
1	44478778	44480811	239	SLC6A9
1	44499410	44504040	240	SLC6A9
1	44508891	44510863	241	SLC6A9
1	44714800	44717230	242	SNORA110
1	44721845	44724798	243	SNORA110
1	44725936	44728655	244	SNORA110
1	44773349	44775330	245	ERI3
1	44778368	44783504	246	ERI3
1	44853692	44854177	247	RNF220
1	45100391	45106293	248	TMEM53
1	45115321	45116526	249	TMEM53
1	45196043	45197092	250	KIF2C
1	45264820	45264896	251	PLK3
1	45398985	45403274	252	EIF2B3
1	45404452	45407346	253	EIF2B3
1	45409810	45415336	254	EIF2B3
1	45839403	45840365	255	MUTYH
1	46261624	46264061	256	MAST2
1	46328125	46329019	257	MAST2
1	46600043	46602294	258	LOC101929626
1	46827068	46829802	259	NSUN4
1	46924074	46924680	260	LINC01398
1	46929585	46931603	261	LINC01398
1	47152764	47155571	262	EFCAB14-AS1
1	47574708	47575726	263	CYP4A22
1	47956586	47957611	264	LINC01389
1	49075792	49077574	265	SPATA6
1	49395403	49395772	266	BEND5
1	49516747	49518657	267	LOC101929721
1	51035617	51036710	268	DMRTA2
1	51426936	51427043	269	FAF1
1	51700892	51700944	270	RNF11
1	53127787	53129159	271	FAM159A
1	53140031	53141149	272	COA7
1	53574784	53575334	273	SLC1A7
1	53581034	53583908	274	SLC1A7
1	53584901	53588914	275	SLC1A7
1	53598857	53602929	276	SLC1A7
1	53603284	53603538	277	SLC1A7
1	53604740	53607303	278	SLC1A7
1	53609304	53613218	279	SLC1A7
1	53753883	53755667	280	LRP8
1	53768635	53770409	281	LRP8
1	53773594	53778211	282	LRP8
1	53780668	53788540	283	LRP8
1	53841285	53842812	284	LOC105378732
1	53928416	53929022	285	DMRTB1
1	54273243	54273596	286	NDC1
1	54535432	54535818	287	TMEM59
1	54575781	54577806	288	CDCP2
1	54738220	54740840	289	SSBP3-AS1
1	54755333	54756331	290	SSBP3-AS1
1	54761711	54767083	291	SSBP3-AS1
1	54779650	54781878	292	SSBP3-AS1
1	54783664	54784765	293	SSBP3-AS1
1	54790193	54793738	294	SSBP3
1	54804949	54805023	295	SSBP3
1	54821403	54822754	296	SSBP3
1	54873068	54874245	297	SSBP3
1	55014807	55014876	298	ACOT11
1	55024428	55026773	299	ACOT11
1	55036407	55037380	300	ACOT11
1	55392967	55393780	301	DHCR24
1	56862078	56863320	302	PLPP3
1	56890231	56891532	303	PLPP3
1	58088236	58089241	304	DAB1-AS1
1	58235039	58237695	305	DAB1-AS1
1	58622948	58624717	306	DAB1
1	59974724	59975277	307	FGGY
1	60437393	60438820	308	CYP2J2
1	60480564	60481070	309	C1orf87
1	60482115	60484466	310	C1orf87
1	61162550	61163708	311	LOC101926964
1	61360443	61363271	312	LOC101926964
1	61455373	61457161	313	NFIA-AS2
1	61543946	61544308	314	NFIA
1	62033737	62036044	315	MGC34796
1	62636368	62637641	316	L1TD1
1	62642601	62644250	317	L1TD1
1	62915482	62917124	318	USP1
1	64270061	64275422	319	ROR1
1	64462444	64462736	320	ROR1-AS1
1	64972597	64972827	321	CACHD1
1	65885063	65885130	322	LEPROT
1	66846983	66848192	323	PDE4B
1	66853757	66855803	324	PDE4B
1	66861075	66865982	325	PDE4B
1	66868279	66868486	326	PDE4B
1	67041415	67044089	327	SGIP1
1	68144011	68144988	328	GADD45A
1	68411370	68412185	329	DIRAS3
1	69595160	69595744	330	LRRC7
1	69741734	69742154	331	LRRC7
1	70568684	70569328	332	LRRC40
1	70582236	70583463	333	LRRC40
1	70606049	70607206	334	LRRC40
1	73982082	73984065	335	LINC01360
1	74041564	74042024	336	LINC01360
1	74937182	74937905	337	ERICH3-AS1
1	74969017	74975368	338	ERICH3-AS1
1	75087607	75088213	339	ERICH3-AS1
1	75151647	75156363	340	ERICH3
1	75178097	75179162	341	TYW3
1	75636169	75636831	342	LHX8
1	75657000	75657563	343	LHX8
1	78150112	78151194	344	ZZZ3
1	81779450	81780528	345	LOC101927434
1	81943856	81944645	346	LOC101927434
1	84425309	84427187	347	TTLL7
1	84547969	84549893	348	PRKACB
1	84963129	84964555	349	SPATA1
1	85032516	85039162	350	CTBS
1	85041163	85041675	351	CTBS
1	85045772	85050288	352	CTBS
1	85084972	85085713	353	LINC01461
1	85128102	85132882	354	SSX2IP
1	85150950	85153212	355	SSX2IP
1	85157240	85158181	356	SSX2IP
1	85164109	85168618	357	SSX2IP
1	85176305	85177931	358	SSX2IP
1	85179698	85182592	359	SSX2IP
1	85219415	85220280	360	SSX2IP
1	85224883	85225788	361	SSX2IP
1	88219031	88220307	362	LINC01364
1	88297224	88298302	363	LINC01364
1	89147989	89148826	364	PKN2
1	89295671	89296885	365	GTF2B
1	90032225	90033084	366	LRRC8B
1	90456159	90457877	367	GEMIN8P4
1	92226916	92227409	368	TGFBR3
1	92245268	92245859	369	TGFBR3
1	92256355	92258239	370	TGFBR3
1	92311087	92312942	371	TGFBR3
1	92328252	92330598	372	TGFBR3
1	92332063	92333114	373	TGFBR3
1	92632468	92633414	374	KIAA1107
1	92644739	92645739	375	KIAA1107
1	93421141	93423193	376	FAM69A
1	93465948	93467089	377	FAM69A
1	93543666	93543791	378	MTF2
1	93801365	93802506	379	CCDC18-AS1
1	94311165	94311387	380	BCAR3
1	94442000	94446800	381	GCLM
1	94882643	94882932	382	ABCD3
1	95446166	95447045	383	LOC729970
1	95465798	95466619	384	LOC101928098
1	97603348	97604592	385	DPYD-AS1
1	97922573	97924380	386	DPYD-AS2
1	98869700	98872899	387	LOC729987
1	99364043	99365115	388	LOC100129620
1	99411244	99412338	389	LOC100129620
1	99619294	99620517	390	PLPPR4
1	99642512	99649039	391	PLPPR4
1	99658336	99659909	392	PLPPR4
1	99682854	99684807	393	PLPPR4
1	99743348	99750228	394	PLPPR4
1	99849482	99849881	395	LOC101928270
1	99904346	99905743	396	LOC101928270
1	99929461	99948084	397	LOC101928270
1	99957069	99964492	398	LOC101928270
1	99991171	99993278	399	LOC101928270
1	100109964	100110430	400	PALMD
1	100934334	100935542	401	GPR88
1	101668688	101671655	402	LOC101928370
1	102281170	102282738	403	OLFM3
1	107901154	107901916	404	NTNG1
1	108743980	108744500	405	SLC25A24
1	109358532	109359934	406	AKNAD1
1	109432358	109433106	407	GPSM2
1	109631560	109632362	408	TMEM167B
1	109691025	109693034	409	KIAA1324
1	109941567	109941808	410	SORT1
1	110075255	110081493	411	GPR61
1	110083494	110084071	412	GPR61
1	110087183	110090185	413	GNAI3
1	110153598	110154704	414	GNAT2
1	110175533	110175739	415	AMPD2
1	110180983	110183048	416	AMPD2
1	110335803	110336953	417	EPS8L3
1	110591826	110593663	418	STRIP1
1	110713372	110715696	419	SLC6A17
1	110730482	110731701	420	KCNC4-AS1
1	110791749	110793480	421	KCNC4
1	111009233	111010205	422	CYMP
1	112049850	112051370	423	TMIGD3
1	112127616	112128546	424	TMIGD3
1	112280275	112280484	425	FAM212B
1	112328691	112330803	426	FAM212B
1	112336241	112337246	427	FAM212B
1	112423314	112424675	428	KCND3-IT1
1	112446815	112447555	429	KCND3-AS1
1	112490390	112492021	430	KCND3-AS1
1	112509891	112512109	431	KCND3
1	112583651	112584731	432	LOC643355
1	113424534	113425801	433	LINC01356
1	113448382	113449079	434	AKR7A2P1
1	113500037	113500375	435	SLC16A1-AS1
1	113582466	113583488	436	LOC100996251
1	113844892	113846870	437	MAGI3
1	114304804	114307609	438	PHTF1
1	114311090	114313140	439	PHTF1
1	114420899	114421229	440	PTPN22
1	114454738	114456265	441	DCLRE1B
1	114480509	114483120	442	HIPK1-AS1
1	114488533	114491272	443	HIPK1
1	114895140	114896574	444	TRIM33
1	115129296	115131492	445	BCAS2
1	116336374	116341066	446	CASQ2
1	116797632	116798782	447	ATP1A1
1	116808564	116809583	448	ATP1A1
1	116815676	116816804	449	ATP1A1
1	116917815	116920240	450	ATP1A1
1	117276201	117277159	451	CD2
1	119681827	119682018	452	LOC101929147
1	120481689	120482429	453	ADAM30
1	144027564	144029607	454	FAM72C
1	144046621	144048588	455	NBPF20
1	144706941	144709799	456	NBPF8
1	144982560	144984625	457	PDE4DIP
1	145109374	145111434	458	SEC22B
1	145436743	145437437	459	TXNIP
1	145448178	145449773	460	TXNIP
1	145454333	145457178	461	POLR3GL
1	145478067	145479024	462	LIX1L
1	145506080	145506556	463	RBM8A
1	145573768	145574987	464	PIAS3
1	146981467	146982742	465	LINC00624
1	147011641	147012270	466	BCL9
1	149839038	149839259	467	HIST2H4B
1	150037646	150038349	468	VPS45
1	150284000	150284412	469	PRPF3
1	150501203	150502089	470	FALEC
1	150533224	150536413	471	ADAMTSL4-AS1
1	150591925	150593314	472	ENSA
1	150933716	150935225	473	CERS2
1	151041823	151042053	474	GABPB2
1	151044080	151044343	475	GABPB2
1	151158579	151161688	476	VPS72
1	151214682	151217341	477	PSMD4
1	151255788	151257115	478	ZNF687
1	151511682	151511780	479	TUFT1
1	151683021	151687791	480	CELF3
1	151690296	151693012	481	CELF3
1	151700390	151702221	482	RIIAD1
1	153852919	153855282	483	GATAD2B
1	153937117	153937182	484	SLC39A1
1	153938903	153939207	485	SLC39A1
1	154023523	154024934	486	RPS27
1	154151697	154152687	487	TPM3
1	154158134	154159213	488	TPM3
1	154532120	154532917	489	UBE2Q1
1	154571429	154573027	490	ADAR
1	154581724	154581777	491	ADAR
1	154638497	154639446	492	ADAR
1	154828262	154828918	493	KCNN3
1	154910484	154910814	494	PMVK
1	154944942	154945958	495	SHC1
1	154976106	154978662	496	ZBTB7B
1	154980857	154986054	497	ZBTB7B
1	155196098	155196324	498	GBAP1
1	155241690	155242319	499	CLK2
1	155362279	155363514	500	POU5F1P4
1	155444683	155445585	501	POU5F1P4
1	155469317	155471277	502	ASH1L-AS1
1	155472923	155473792	503	ASH1L-AS1
1	155568367	155569870	504	MSTO1
1	155828155	155828190	505	GON4L
1	155840988	155841946	506	SYT11
1	155905233	155905251	507	KIAA0907
1	155929461	155931545	508	ARHGEF2
1	155938298	155940413	509	ARHGEF2
1	155952332	155954187	510	ARHGEF2
1	156039295	156046932	511	MEX3A
1	156092268	156094812	512	LMNA
1	156183779	156184470	513	PMF1
1	156241646	156243225	514	SMG5
1	156457668	156459390	515	MEF2D
1	156461391	156469633	516	MEF2D
1	156471634	156475864	517	MEF2D
1	156637955	156638145	518	NES
1	156711923	156712252	519	MRPL24
1	156723240	156724907	520	HDGF
1	156773504	156775546	521	NTRK1
1	156821813	156822965	522	INSRR
1	157420252	157420608	523	FCRL5
1	157429674	157431166	524	FCRL5
1	158022592	158023654	525	KIRREL
1	159137448	159140376	526	CADM3
1	159176049	159179498	527	ACKR1
1	159800980	159802192	528	SLAMF8
1	159906640	159913876	529	IGSF9
1	160163236	160163558	530	CASQ1
1	160179659	160180758	531	LOC729867
1	160226268	160227748	532	DCAF8
1	160331142	160335860	533	NHLH1
1	160343905	160346139	534	NHLH1
1	160369211	160369363	535	VANGL2
1	161055098	161056022	536	NECTIN4
1	161135113	161135180	537	PPOX
1	161154284	161156922	538	B4GALT3
1	161166174	161167842	539	ADAMTS4
1	161170888	161170936	540	NDUFS2
1	162188970	162189922	541	NOS1AP
1	162581634	162583977	542	DDR2
1	162618219	162621027	543	DDR2
1	162757118	162759491	544	HSD17B7
1	163442442	163443065	545	LOC100422212
1	164675582	164677844	546	LOC100505795
1	164680355	164682749	547	LOC100505795
1	164744878	164744900	548	LOC100505795
1	164770940	164771988	549	LOC100505795
1	165253874	165255765	550	LMX1A
1	165257073	165258231	551	LMX1A
1	165315446	165316532	552	LMX1A
1	165344515	165346365	553	LMX1A
1	165407611	165413591	554	RXRG
1	165562362	165564088	555	LOC400794
1	165665730	165666899	556	ALDH9A1
1	166447280	166448197	557	FMO9P
1	166782850	166783065	558	POGK
1	167103782	167105967	559	DUSP27
1	167134399	167136916	560	LINC01363
1	167155463	167156689	561	LINC01363
1	167175989	167176926	562	LINC01363
1	168440300	168440675	563	LOC101928565
1	168710504	168713513	564	DPT
1	169077641	169080495	565	ATP1B1
1	169927394	169928347	566	SCYL3
1	169968368	169968699	567	KIFAP3
1	170017607	170019387	568	KIFAP3
1	170986045	170987200	569	FMO3
1	171001680	171002916	570	FMO3
1	171712379	171712737	571	VAMP4
1	171749633	171749760	572	METTL13
1	173091571	173092993	573	TNFSF18
1	173398693	173399573	574	LOC101928673
1	173413080	173415816	575	LOC101928673
1	173443212	173445293	576	LOC100506023
1	174025754	174026510	577	RC3H1
1	174488786	174489848	578	GPR52
1	174739848	174743724	579	RABGAP1L
1	174760386	174762195	580	RABGAP1L
1	174763700	174764946	581	RABGAP1L
1	174766904	174768034	582	RABGAP1L
1	174808762	174809676	583	RABGAP1L
1	174845656	174845881	584	RABGAP1L
1	174852803	174853808	585	RABGAP1L
1	174899757	174901083	586	LOC101928696
1	174924398	174924978	587	LOC101928696
1	175247082	175247949	588	KIAA0040
1	176191157	176192147	589	RFWD2
1	176331653	176336020	590	PAPPA2
1	176770495	176771251	591	PAPPA2
1	176781215	176781462	592	PAPPA2
1	176872585	176874977	593	ASTN1
1	177150155	177151957	594	BRINP2
1	177871183	177872379	595	SEC16B
1	178110597	178120509	596	RASAL2-AS1
1	178129780	178130285	597	RASAL2-AS1
1	178417598	178418314	598	TEX35
1	178512931	178513550	599	C1orf220
1	178612138	178613946	600	RALGPS2
1	178619444	178623568	601	RALGPS2
1	178993852	178993938	602	FAM20B
1	179089661	179090562	603	ABL2
1	179113394	179116570	604	ABL2
1	179723252	179724032	605	FAM163A
1	180166044	180166143	606	FLJ23867
1	180168144	180169249	607	FLJ23867
1	180221754	180226785	608	LHX4-AS1
1	180229053	180232423	609	LHX4-AS1
1	180234488	180235138	610	LHX4-AS1
1	180236991	180238485	611	LHX4-AS1
1	180239081	180239367	612	LHX4-AS1
1	180250318	180258275	613	LHX4-AS1
1	180266939	180271102	614	LHX4-AS1
1	180310944	180314715	615	LHX4-AS1
1	180318878	180333461	616	LHX4-AS1
1	180881180	180881312	617	KIAA1614
1	180891884	180893171	618	KIAA1614
1	180893591	180900934	619	KIAA1614
1	180922086	180924206	620	KIAA1614
1	180937803	180938800	621	STX6
1	180941865	180943359	622	STX6
1	181044384	181045817	623	IER5
1	181046687	181047514	624	IER5
1	181067988	181069644	625	IER5
1	181086623	181087547	626	IER5
1	181097298	181098692	627	IER5
1	181121090	181122858	628	LOC101928973
1	181147808	181151273	629	LOC101928973
1	181217269	181218826	630	GM140
1	181728315	181729609	631	CACNA1E
1	182284196	182288066	632	LINC01344
1	182585275	182587589	633	LOC284648
1	182667835	182669728	634	RGS8
1	184265320	184266066	635	C1orf21
1	184438183	184439375	636	C1orf21
1	184579822	184580991	637	EDEM3
1	185410409	185414449	638	GS1-279B7.1
1	185448318	185449884	639	GS1-279B7.1
1	185466808	185469192	640	LINC01350
1	185618481	185620544	641	LINC01350
1	186376805	186376958	642	OCLM
1	186446716	186449138	643	PDC
1	188955759	188956546	644	BRINP3
1	190073508	190074925	645	BRINP3
1	190773733	190775203	646	LOC440704
1	190817836	190820227	647	LOC440704
1	190945546	190946227	648	LOC440704
1	191677961	191679680	649	RGS18
1	191683207	191684926	650	RGS18
1	192028185	192029235	651	RGS18
1	193156743	193157363	652	B3GALT2
1	197432164	197433917	653	CRB1
1	197642808	197643823	654	DENND1B
1	198203014	198204942	655	NEK7
1	198651060	198651506	656	PTPRC
1	198817088	198820186	657	LINC01221
1	198971880	198973000	658	LINC01221
1	199001709	199003179	659	LINC01222
1	199201545	199202377	660	LINC01222
1	200645705	200646507	661	DDX59
1	200941412	200944067	662	KIF21B
1	200960443	200962851	663	KIF21B
1	200993828	200993945	664	KIF21B
1	200994617	200998584	665	KIF21B
1	201000755	201002644	666	KIF21B
1	201011122	201012163	667	KIF21B
1	201082966	201083499	668	ASCL5
1	201104792	201109753	669	TMEM9
1	201139446	201139709	670	TMEM9
1	201235611	201239790	671	PKP1
1	201250413	201251555	672	PKP1
1	201395254	201396650	673	TNNI1
1	201894913	201896450	674	LMOD1
1	201909914	201911647	675	LMOD1
1	202336193	202336828	676	PPP1R12B
1	202803827	202804635	677	MGAT4EP
1	203258427	203260712	678	LINC01353
1	203289356	203291151	679	BTG2
1	203291898	203298129	680	BTG2
1	203460436	203461823	681	OPTC
1	203489323	203492197	682	OPTC
1	203606232	203607138	683	ATP2B4
1	203662119	203662852	684	SNORA77
1	203828943	203829712	685	SNRPE
1	203840181	203841032	686	SNRPE
1	204113898	204116994	687	LOC101929441
1	204141482	204142232	688	REN
1	204319422	204319789	689	PLEKHA6
1	204484329	204484506	690	MDM4
1	204486507	204487892	691	MDM4
1	204605920	204608239	692	LRRN2
1	204620301	204620880	693	LRRN2
1	205092150	205093048	694	RBBP5
1	205160382	205161370	695	DSTYK
1	205282581	205283337	696	NUAK2
1	205305664	205306306	697	NUAK2
1	205316796	205325127	698	KLHDC8A
1	205327218	205332678	699	KLHDC8A
1	205392770	205395991	700	LEMD1
1	205396875	205400718	701	LEMD1
1	205406767	205416525	702	BLACAT1
1	205426214	205437635	703	BLACAT1
1	205438378	205439139	704	BLACAT1
1	205440988	205444818	705	BLACAT1
1	205446301	205455929	706	CDK18
1	205460878	205465902	707	CDK18
1	205511226	205513780	708	LOC284578
1	205514869	205516302	709	LOC284578
1	205521371	205522316	710	LOC284578
1	205539112	205541322	711	MFSD4A
1	205561129	205563047	712	MFSD4A
1	205570865	205571925	713	ELK4
1	205639474	205640531	714	SLC45A3
1	206490277	206491873	715	SRGAP2C
1	206509057	206511354	716	SRGAP2C
1	206594575	206596186	717	SRGAP2D
1	206823948	206824330	718	DYRK3
1	207232336	207233464	719	PFKFB2
1	208056845	208059163	720	CD34
1	208143186	208146543	721	CD34
1	208213848	208215482	722	CD34
1	208256130	208257649	723	PLXNA2
1	208292546	208294020	724	PLXNA2
1	210018236	210020040	725	DIEXF
1	210422672	210426791	726	SERTAD4-AS1
1	210431523	210434163	727	SERTAD4-AS1
1	210464704	210469590	728	HHAT
1	210927970	210929989	729	KCNH1
1	211646998	211650667	730	RD3
1	211667259	211669109	731	RD3
1	211922956	211925652	732	NEK2
1	211935116	211936765	733	LOC102723727
1	212623239	212625046	734	NENF
1	212629422	212629965	735	NENF
1	212636444	212638096	736	NENF
1	214065250	214066373	737	LINC00538
1	214618974	214620772	738	PTPN14
1	214821452	214822636	739	CENPF
1	215739520	215739721	740	KCTD3
1	215767629	215768955	741	KCTD3
1	216592174	216595737	742	USH2A
1	216597738	216601312	743	USH2A
1	216739338	216740661	744	USH2A
1	216857610	216865016	745	ESRRG
1	216866191	216866560	746	ESRRG
1	216872759	216876258	747	ESRRG
1	216878159	216885831	748	ESRRG
1	216887156	216887470	749	ESRRG
1	216922358	216923248	750	ESRRG
1	217096054	217097083	751	ESRRG
1	218991051	218991880	752	LYPLAL1-AS1
1	219099147	219099520	753	LYPLAL1-AS1
1	219164029	219164486	754	LYPLAL1-AS1
1	220392670	220392990	755	SNORA36B
1	220446843	220447230	756	RAB3GAP2
1	220472995	220473198	757	RAB3GAP2
1	220501542	220507007	758	RAB3GAP2
1	220535026	220538449	759	RAB3GAP2
1	220542709	220544622	760	RAB3GAP2
1	220700198	220700524	761	MARK1
1	221437132	221439376	762	C1orf140
1	221447070	221448401	763	C1orf140
1	221456573	221457513	764	C1orf140
1	223195583	223197226	765	TLR5
1	223893640	223894177	766	CAPN2
1	223944536	223945362	767	CAPN2
1	223967030	223973676	768	TP53BP2
1	224034674	224035024	769	TP53BP2
1	224057974	224059070	770	TP53BP2
1	224075167	224076387	771	TP53BP2
1	224254493	224258011	772	FBXO28
1	224398006	224399980	773	LOC101927143
1	224690205	224691696	774	CNIH3
1	225753362	225756928	775	ENAH
1	225766392	225769264	776	ENAH
1	225782761	225784631	777	ENAH
1	225805144	225806930	778	ENAH
1	225814673	225816572	779	ENAH
1	225950863	225951987	780	SRP9
1	225956035	225957546	781	SRP9
1	225959592	225960081	782	SRP9
1	226118624	226119866	783	PYCR2
1	226188066	226188154	784	SDE2
1	226498449	226498891	785	LIN9
1	226588177	226589488	786	PARP1
1	226640276	226641280	787	PARP1
1	226662070	226663008	788	PARP1
1	227180891	227182303	789	ADCK3
1	227222553	227223833	790	ADCK3
1	228354509	228354538	791	IBA57
1	228457193	228457848	792	C1orf145
1	228916584	228917642	793	RHOU
1	229049365	229049970	794	RHOU
1	229163258	229165347	795	RAB4A
1	229340006	229340151	796	RAB4A
1	229340886	229341785	797	RAB4A
1	229514701	229516099	798	CCSAP
1	229546191	229547703	799	ACTA1
1	230312134	230314268	800	GALNT2
1	230969275	230970102	801	C1orf198
1	231745531	231746835	802	LINC00582
1	231748836	231750509	803	LINC00582
1	231763561	231767662	804	DISC1
1	231769730	231780731	805	DISC1
1	231787543	231787775	806	DISC1
1	231801291	231803780	807	DISC1
1	231825272	231826704	808	DISC1
1	232001495	232004070	809	DISC2
1	232042077	232042326	810	DISC1-IT1
1	232054019	232056946	811	DISC1-IT1
1	232069530	232074131	812	DISC1-IT1
1	232076505	232078245	813	DISC1-IT1
1	232085075	232087397	814	DISC1-IT1
1	232278187	232279432	815	DISC1-IT1
1	232361918	232362353	816	SIPA1L2
1	232385142	232387246	817	SIPA1L2
1	233060999	233062383	818	NTPCR
1	233101411	233102267	819	NTPCR
1	233835907	233836117	820	KCNK1
1	234129631	234137839	821	SLC35F3
1	234222115	234222944	822	SLC35F3
1	234356420	234358551	823	SLC35F3
1	234416760	234419321	824	SLC35F3
1	234635023	234636704	825	TARBP1
1	234658232	234660998	826	LINC01354
1	234669072	234670976	827	LINC01354
1	234679232	234681107	828	LINC01354
1	234698137	234698544	829	LINC01354
1	234722851	234727029	830	IRF2BP2
1	234746271	234750257	831	IRF2BP2
1	234754615	234756777	832	LINC00184
1	234856848	234858788	833	LINC01132
1	234860789	234864797	834	LINC01132
1	234932319	234933371	835	LINC01132
1	235245954	235247756	836	SNORA14B
1	235504496	235506571	837	GGPS1
1	235574629	235575716	838	TBCE
1	235618731	235620054	839	B3GALNT2
1	235659070	235662370	840	B3GALNT2
1	235716127	235717141	841	B3GALNT2
1	235997260	236000083	842	LYST
1	236005547	236006822	843	LYST
1	236008699	236009147	844	LYST
1	236022562	236023441	845	LYST
1	236031227	236031364	846	LYST
1	236634412	236637257	847	LGALS8
1	236649375	236650175	848	LGALS8
1	238394616	238396777	849	LINC01139
1	238557631	238559359	850	LINC01139
1	238602001	238603677	851	LINC01139
1	238637137	238639698	852	LINC01139
1	238769795	238771790	853	LINC01139
1	238812462	238813380	854	LINC01139
1	238821989	238828119	855	LINC01139
1	238834315	238837180	856	LINC01139
1	239275522	239276236	857	CHRM3
1	239886448	239887854	858	CHRM3-AS2
1	240158094	240159708	859	RPS7P5
1	240218808	240221223	860	FMN2
1	240350950	240352026	861	FMN2
1	240466973	240469159	862	FMN2
1	241104547	241106446	863	GREM2
1	241264118	241266107	864	RGS7
1	243553954	243557984	865	SDCCAG8
1	243579830	243580797	866	SDCCAG8
1	243806067	243807165	867	AKT3
1	243874639	243878661	868	AKT3
1	244055582	244056343	869	LOC339529
1	244064722	244066526	870	LOC339529
1	244094379	244095007	871	LOC339529
1	244619057	244619991	872	ADSS
1	244623461	244623672	873	C1orf101
1	244918566	244919740	874	COX20
1	244934311	244934594	875	COX20
1	245002545	245004365	876	COX20
1	245028827	245029909	877	HNRNPU
1	245131968	245132170	878	EFCAB2
1	245223956	245224686	879	LOC101928068
1	246481154	246484819	880	SMYD3
1	247383714	247385455	881	VN1R5
1	247984429	247988658	882	OR14A16
1	248006198	248007655	883	OR11L1
1	248028370	248029663	884	TRIM58
1	249201442	249202503	885	PGBD2
10	726418	726845	886	DIP2C
10	1803916	1804827	887	ADARB2
10	2008478	2011435	888	LINC00700
10	2018718	2021347	889	LINC00700
10	2207736	2208744	890	LINC00701
10	2211155	2212617	891	LINC00701
10	2839135	2842525	892	PFKP
10	3431108	3431811	893	LOC105376360
10	3734264	3735856	894	KLF6
10	3828473	3829309	895	KLF6
10	5555647	5556595	896	CALML3
10	5686564	5688921	897	ASB13
10	5856512	5856599	898	GDI2
10	10161838	10163220	899	LOC101928298
10	10336627	10337878	900	LOC101928322
10	10474008	10475262	901	LOC101928322
10	10671717	10673003	902	SFTA1P
10	11057301	11058262	903	CELF2
10	11220157	11220449	904	CELF2
10	11220642	11221114	905	CELF2
10	11309642	11310667	906	CELF2-AS1
10	11605758	11606223	907	USP6NL
10	11798917	11800277	908	ECHDC3
10	12525696	12527273	909	CAMK1D
10	12670443	12671737	910	CAMK1D
10	12719491	12720476	911	CCDC3
10	13162651	13163921	912	OPTN
10	14689714	14691466	913	FAM107B
10	14878275	14878982	914	CDNF
10	14900858	14901210	915	SUV39H2
10	16741792	16742017	916	RSU1
10	16786317	16788282	917	RSU1
10	16793538	16794651	918	RSU1
10	17064089	17065824	919	CUBN
10	18686769	18686937	920	CACNB2
10	18788236	18791713	921	CACNB2
10	18915188	18916939	922	NSUN6
10	21811643	21813610	923	SKIDA1
10	21820269	21821277	924	MLLT10
10	22013237	22021422	925	MLLT10
10	22840723	22844405	926	LOC100499489
10	22887350	22888507	927	PIP4K2A
10	22893980	22894339	928	PIP4K2A
10	22897157	22899961	929	PIP4K2A
10	22966134	22966490	930	PIP4K2A
10	23092796	23095899	931	PIP4K2A
10	23200674	23202442	932	ARMC3
10	25159767	25162122	933	PRTFDC1
10	25190536	25191504	934	PRTFDC1
10	25306508	25307112	935	THNSL1
10	27486166	27490381	936	ACBD5
10	27498436	27499881	937	ACBD5
10	27516458	27517454	938	ACBD5
10	27795348	27797073	939	RAB18
10	28565207	28566246	940	MPP7
10	28584262	28586088	941	MPP7
10	28926370	28926701	942	BAMBI
10	29685547	29687381	943	SVIL-AS1
10	29701095	29702641	944	SVIL-AS1
10	29796822	29797217	945	SVIL-AS1
10	30377429	30380243	946	KIAA1462
10	30865603	30871244	947	LYZL2
10	30963443	30966147	948	SVILP1
10	30969506	30971545	949	SVILP1
10	31071779	31074693	950	LOC105376480
10	31104790	31106081	951	LOC105376480
10	31207088	31208594	952	ZNF438
10	31319759	31319865	953	ZNF438
10	31330636	31331249	954	ZNF438
10	31422130	31424743	955	LOC101929352
10	31446289	31447096	956	LOC101929352
10	31492580	31493726	957	LOC101929352
10	31891139	31894059	958	ZEB1
10	31986196	31986795	959	ARHGAP12
10	31996184	31996490	960	ARHGAP12
10	32009523	32010677	961	ARHGAP12
10	32037841	32040148	962	ARHGAP12
10	32046053	32047156	963	ARHGAP12
10	32321921	32324941	964	KIF5B
10	32668726	32668766	965	EPC1
10	33330626	33331108	966	ITGB1
10	34629088	34629355	967	PARD3
10	35618299	35619274	968	CCNY
10	35847894	35848712	969	GJD4
10	36173022	36174735	970	PCAT5
10	36179839	36181102	971	PCAT5
10	38264373	38264452	972	ZNF25
10	38644059	38644307	973	HSD17B7P2
10	42769569	42770331	974	LOC441666
10	44435001	44435700	975	LINC00841
10	44579907	44580787	976	LINC00841
10	44728526	44730391	977	C10orf142
10	44796617	44797508	978	C10orf142
10	45475330	45475837	979	C10orf10
10	45491314	45492124	980	ZNF22
10	46672542	46674031	981	FRMPD2B
10	48859422	48861128	982	FRMPD2B
10	49379944	49381615	983	FRMPD2
10	49495298	49496063	984	FRMPD2
10	52133409	52134716	985	ASAH2
10	52314283	52315774	986	SGMS1
10	52320479	52322060	987	SGMS1
10	52336069	52339675	988	SGMS1
10	53454009	53454979	989	CSTF2T
10	53460355	53460521	990	CSTF2T
10	53502780	53503913	991	CSTF2T
10	53574475	53576213	992	CSTF2T
10	56466950	56468291	993	PCDH15
10	57110929	57111633	994	MTRNR2L5
10	57159970	57161764	995	MTRNR2L5
10	57169359	57171434	996	MTRNR2L5
10	59800161	59801652	997	IPMK
10	60061103	60062435	998	CISD1
10	60114445	60115304	999	UBE2D1
10	60335171	60336743	1000	BICC1
10	60377817	60379588	1001	FAM133CP
10	60402558	60403659	1002	FAM133CP
10	60802956	60803793	1003	LINC00844
10	60857756	60860303	1004	CCEPR
10	60861574	60866426	1005	CCEPR
10	60868527	60872445	1006	CCEPR
10	60874981	60876495	1007	CCEPR
10	61316998	61317372	1008	SLC16A9
10	61511659	61512202	1009	MRLN
10	61514203	61514292	1010	MRLN
10	61667414	61668697	1011	CCDC6
10	63594681	63599202	1012	ARID5B
10	63656866	63660012	1013	ARID5B
10	63843606	63844269	1014	ARID5B
10	64925889	64927551	1015	NRBF2
10	65226761	65227107	1016	JMJD1C
10	65282835	65283822	1017	JMJD1C
10	65332569	65333431	1018	JMJD1C
10	65343256	65348748	1019	JMJD1C
10	65352178	65354308	1020	JMJD1C
10	65387057	65392321	1021	JMJD1C
10	65424296	65425557	1022	JMJD1C
10	65430059	65430729	1023	JMJD1C
10	65470145	65474659	1024	JMJD1C
10	70010889	70011842	1025	ATOH7
10	70029709	70032712	1026	ATOH7
10	70087709	70088903	1027	HNRNPH3
10	70089566	70090449	1028	HNRNPH3
10	70659621	70660033	1029	DDX50
10	70882721	70882908	1030	VPS26A
10	71197752	71200186	1031	TSPAN15
10	71239443	71241678	1032	TSPAN15
10	71793827	71796337	1033	H2AFY2
10	71811217	71811356	1034	H2AFY2
10	72357069	72357693	1035	PRF1
10	72663325	72666517	1036	PCBD1
10	72667138	72667427	1037	PCBD1
10	72686183	72688150	1038	LOC105378349
10	72819354	72819601	1039	LOC105378349
10	73106292	73107387	1040	SLC29A3
10	73109804	73110762	1041	SLC29A3
10	73111835	73113587	1042	SLC29A3
10	73235151	73235834	1043	LOC102723377
10	73594637	73601922	1044	PSAP
10	73613325	73614230	1045	PSAP
10	73619967	73621116	1046	PSAP
10	73631252	73633629	1047	PSAP
10	73656573	73656812	1048	PSAP
10	73678102	73683126	1049	CHST3
10	73740953	73742322	1050	CHST3
10	73828722	73830707	1051	SPOCK2
10	73837710	73841281	1052	SPOCK2
10	73843993	73846570	1053	SPOCK2
10	73899190	73899369	1054	SPOCK2
10	73992971	73995002	1055	ASCC1
10	74014105	74015185	1056	DDIT4
10	74019210	74021342	1057	DDIT4
10	74032070	74032676	1058	DDIT4
10	74079222	74081436	1059	DNAJB12
10	74495781	74496708	1060	MCU
10	75754442	75755391	1061	VCL
10	76177130	76180398	1062	LOC102723439
10	76344904	76346493	1063	LOC102723439
10	76348816	76349995	1064	LOC102723439
10	76403359	76404074	1065	LOC102723439
10	76596564	76597952	1066	KAT6B
10	76680959	76685917	1067	LOC101929165
10	76692160	76693065	1068	LOC101929165
10	76707076	76708812	1069	LOC101929165
10	76929386	76930897	1070	VDAC2
10	78318646	78320189	1071	KCNMA1-AS1
10	78840943	78841795	1072	KCNMA1-AS2
10	78850600	78851051	1073	KCNMA1-AS2
10	79012068	79013528	1074	KCNMA1
10	79171817	79174693	1075	KCNMA1-AS3
10	79182164	79185518	1076	KCNMA1-AS3
10	79200541	79203329	1077	KCNMA1-AS3
10	79819601	79820890	1078	RPS24
10	79898816	79900491	1079	RPS24
10	79958282	79959412	1080	LINC00856
10	79971525	79972646	1081	LINC00856
10	80052228	80053710	1082	LINC00595
10	80062206	80063702	1083	LINC00595
10	80166684	80167771	1084	LINC00595
10	80192775	80193963	1085	LINC00595
10	80385992	80386229	1086	LINC00595
10	80448210	80449696	1087	ZMIZ1-AS1
10	80521056	80521351	1088	ZMIZ1-AS1
10	80606013	80608509	1089	ZMIZ1-AS1
10	80732114	80735026	1090	ZMIZ1-AS1
10	80908350	80909717	1091	ZMIZ1
10	80954300	80955312	1092	ZMIZ1
10	80979931	80984346	1093	PPIF
10	80986340	80986927	1094	PPIF
10	81033631	81033814	1095	PPIF
10	81034203	81035311	1096	PPIF
10	83421337	83422213	1097	NRG3
10	84913609	84913876	1098	LOC105378397
10	85302315	85304336	1099	LOC105378397
10	85641157	85641595	1100	LOC105378397
10	85896949	85898184	1101	GHITM
10	85912407	85913583	1102	GHITM
10	85917342	85920966	1103	HOST2
10	85936875	85940244	1104	C10orf99
10	85940927	85941703	1105	C10orf99
10	85942123	85948109	1106	CDHR1
10	85953012	85953390	1107	CDHR1
10	85955391	85961365	1108	CDHR1
10	85984164	85984344	1109	LRIT2
10	85986345	85987489	1110	LRIT2
10	86157083	86158815	1111	CCSER2
10	86211084	86213807	1112	CCSER2
10	86326177	86329022	1113	CCSER2
10	88153197	88153662	1114	GRID1
10	88433282	88434559	1115	LDB3
10	88470624	88471968	1116	LDB3
10	88636303	88637375	1117	MMRN2
10	90003002	90004599	1118	RNLS
10	90014023	90014135	1119	RNLS
10	90131267	90132702	1120	RNLS
10	90145538	90146916	1121	RNLS
10	91037795	91038478	1122	IFIT2
10	92412873	92413637	1123	LOC101926942
10	93638882	93640441	1124	FGFBP3
10	93959910	93961384	1125	CPEB3
10	95463329	95463588	1126	FRA10AC1
10	97086591	97088458	1127	PDLIM1
10	98347809	98347971	1128	TM9SF3
10	98378642	98378972	1129	TM9SF3
10	99302303	99302795	1130	ANKRD2
10	99548468	99548684	1131	SFRP5
10	99628064	99629341	1132	GOLGA7B
10	99821423	99823490	1133	CRTAC1
10	100058796	100060317	1134	LOXL4
10	100067964	100069764	1135	LOXL4
10	101908190	101909679	1136	ERLIN1
10	101946814	101947454	1137	ERLIN1
10	101955478	101956734	1138	ERLIN1
10	102718812	102723375	1139	SEMA4G
10	102760571	102761253	1140	LZTS2
10	103355051	103358094	1141	DPCD
10	103371876	103374359	1142	DPCD
10	103749631	103751492	1143	C10orf76
10	103752199	103754936	1144	C10orf76
10	103875723	103879014	1145	LDB1
10	104072434	104074369	1146	GBF1
10	104093678	104093952	1147	NFKB2
10	104172370	104177900	1148	PSD
10	104386677	104388696	1149	TRIM8
10	104434214	104437988	1150	TRIM8
10	104532424	104533118	1151	WBP1L
10	104536888	104541036	1152	WBP1L
10	104881428	104886414	1153	NT5C2
10	104911990	104915845	1154	NT5C2
10	105302355	105303223	1155	NEURL1-AS1
10	105377273	105380388	1156	NEURL1-AS1
10	105653392	105655464	1157	OBFC1
10	105667619	105669036	1158	OBFC1
10	105711123	105712715	1159	SLK
10	106059062	106061907	1160	LOC101927472
10	112028982	112029280	1161	SMNDC1
10	112203404	112203743	1162	DUSP5
10	112260731	112264240	1163	DUSP5
10	112325635	112326448	1164	SMC3
10	112519055	112520114	1165	PDCD4-AS1
10	112624327	112626127	1166	PDCD4-AS1
10	114457792	114458321	1167	LOC103344931
10	114534749	114536047	1168	LOC103344931
10	114552536	114553774	1169	LOC103344931
10	114563598	114564750	1170	LOC103344931
10	116852006	116852123	1171	ATRNL1
10	119801958	119802777	1172	RAB11FIP2
10	119875630	119877159	1173	CASC2
10	120521502	120521859	1174	CACUL1
10	120577998	120578853	1175	CACUL1
10	120677212	120678534	1176	NANOS1
10	120708117	120709084	1177	NANOS1
10	120965612	120966196	1178	GRK5
10	121378066	121378784	1179	TIAL1
10	121887004	121888361	1180	SEC23IP
10	123680656	123681798	1181	ATE1
10	126584489	126586814	1182	ZRANB1
10	126709178	126715452	1183	CTBP2
10	126717453	126719037	1184	CTBP2
10	127500134	127500624	1185	UROS
10	129214261	129215153	1186	NPS
10	131399963	131402366	1187	MGMT
10	131403175	131405175	1188	MGMT
10	131642638	131643691	1189	EBF3
10	131666166	131672752	1190	EBF3
10	131684461	131684887	1191	EBF3
10	134043347	134044497	1192	STK32C
10	134233814	134235936	1193	C10orf91
11	188901	189881	1194	SCGB1C1
11	355604	356387	1195	B4GALNT4
11	792470	795262	1196	SLC25A22
11	862450	864182	1197	TSPAN4
11	874659	878152	1198	TSPAN4
11	887588	891993	1199	CHID1
11	924500	924808	1200	AP2A2
11	1584840	1590544	1201	DUSP8
11	2196727	2196989	1202	TH
11	2724298	2725481	1203	KCNQ1OT1
11	2799512	2800943	1204	KCNQ1OT1
11	3021381	3022542	1205	NAP1L4
11	3299113	3300498	1206	MRGPRE
11	3344789	3346128	1207	ZNF195
11	4092839	4094066	1208	RRM1
11	4105065	4106226	1209	RRM1
11	6439215	6439340	1210	APBB1
11	6597807	6598956	1211	RRP8
11	6627850	6628393	1212	ILK
11	6634475	6634596	1213	TAF10
11	7034439	7035110	1214	ZNF214
11	7036718	7038502	1215	ZNF214
11	7040160	7040585	1216	ZNF214
11	8249394	8250955	1217	LMO1
11	8304182	8305921	1218	LMO1
11	8310663	8311684	1219	LMO1
11	8350395	8352144	1220	LMO1
11	8376206	8376836	1221	LMO1
11	8410800	8411315	1222	LMO1
11	8412936	8415550	1223	LMO1
11	8663512	8663715	1224	TRIM66
11	8691581	8694623	1225	RPL27A
11	8714980	8716644	1226	SNORA3B
11	8730109	8731107	1227	SNORA3B
11	8736295	8737606	1228	SNORA3B
11	8740853	8743562	1229	SNORA3B
11	8780668	8783846	1230	LOC102724784
11	8828543	8830020	1231	ST5
11	8852136	8852666	1232	ST5
11	8853484	8856202	1233	ST5
11	9337315	9338189	1234	TMEM41B
11	9384271	9386646	1235	IPO7
11	9479998	9481244	1236	LOC644656
11	9586810	9588459	1237	WEE1
11	9594119	9594227	1238	WEE1
11	9738993	9739811	1239	SBF2-AS1
11	10880764	10881794	1240	ZBED5-AS1
11	11342246	11342718	1241	CSNK2A3
11	12242290	12244054	1242	MICAL2
11	12244919	12245701	1243	MICAL2
11	12820812	12821620	1244	TEAD1
11	12835646	12837131	1245	TEAD1
11	12853184	12855545	1246	LINC00958
11	12862103	12870269	1247	LINC00958
11	13132034	13133435	1248	RASSF10
11	13351177	13352474	1249	ARNTL
11	14133982	14136662	1250	SPON1
11	14153324	14155456	1251	SPON1
11	15311158	15312453	1252	INSC
11	15315438	15316894	1253	INSC
11	15911347	15911938	1254	LOC102724957
11	16312928	16315815	1255	SOX6
11	17023164	17023560	1256	PLEKHA7
11	17453497	17458362	1257	ABCC8
11	18057572	18058693	1258	TPH1
11	18082963	18087610	1259	TPH1
11	18305690	18310680	1260	SAA1
11	18405362	18406060	1261	LDHA
11	19514733	19515823	1262	NAV2-AS5
11	20270783	20273130	1263	DBX1
11	20363883	20365231	1264	HTATIP2
11	22579030	22581960	1265	FANCF
11	27237493	27238454	1266	BBOX1-AS1
11	30282376	30283741	1267	FSHB
11	30401728	30404473	1268	ARL14EP
11	30407958	30410452	1269	ARL14EP
11	31498725	31500394	1270	IMMP1L
11	32094442	32095860	1271	RCN1
11	32276133	32278411	1272	SNORA88
11	33723286	33723890	1273	C11orf91
11	33799649	33800802	1274	FBXO3-AS1
11	34072039	34072229	1275	CAPRIN1
11	34197950	34199125	1276	NAT10
11	34959679	34961091	1277	APIP
11	34983130	34984210	1278	APIP
11	35632505	35632796	1279	FJX1
11	35703752	35704782	1280	TRIM44
11	35739049	35740112	1281	TRIM44
11	35808952	35810041	1282	TRIM44
11	35843564	35843937	1283	LDLRAD3
11	36044287	36045243	1284	LOC101928510
11	36184412	36185131	1285	LOC101928510
11	36294205	36294713	1286	COMMD9
11	36433437	36434858	1287	PRR5L
11	36598884	36600856	1288	RAG1
11	36640478	36641789	1289	RAG2
11	37063005	37063489	1290	RAG2
11	38949897	38950888	1291	LINC01493
11	38957090	38958073	1292	LINC01493
11	41230211	41230594	1293	LRRC4C
11	43855003	43857997	1294	ALKBH3
11	43962541	43963105	1295	C11orf96
11	44008668	44011366	1296	C11orf96
11	44783194	44783636	1297	TSPAN18
11	44914516	44916326	1298	TP53I11
11	45379489	45381071	1299	LOC101928812
11	45382104	45383226	1300	LOC101928812
11	45387792	45389010	1301	LOC399886
11	45461043	45462538	1302	LOC399886
11	45581806	45583240	1303	CHST1
11	45613900	45614669	1304	CHST1
11	45632452	45633407	1305	CHST1
11	45872083	45873620	1306	CRY2
11	45880728	45881765	1307	CRY2
11	45917604	45918540	1308	C11orf94
11	45919571	45921539	1309	C11orf94
11	46072277	46072924	1310	PHF21A
11	46442538	46445633	1311	CHRM4
11	46459523	46460831	1312	CHRM4
11	46622095	46624306	1313	AMBRA1
11	46628126	46630877	1314	HARBI1
11	47028591	47029978	1315	C11orf49
11	47047409	47050269	1316	C11orf49
11	47193341	47194461	1317	ARFGAP2
11	47199676	47199806	1318	ARFGAP2
11	47294661	47294991	1319	LOC101928943
11	47437599	47438112	1320	SLC39A13
11	47487649	47489623	1321	RAPSN
11	47591403	47596201	1322	KBTBD4
11	47599118	47599322	1323	KBTBD4
11	47606588	47607229	1324	FAM180B
11	47619231	47622828	1325	C1QTNF4
11	47790030	47790401	1326	FNBP4
11	49006097	49006440	1327	TRIM49B
11	49473992	49476859	1328	LOC440040
11	56980503	56982666	1329	APLNR
11	57093413	57093604	1330	TNKS1BP1
11	57135809	57137750	1331	PRG3
11	57231244	57232206	1332	RTN4RL2
11	57247733	57251001	1333	RTN4RL2
11	57266763	57268050	1334	SLC43A1
11	57447406	57449742	1335	ZDHHC5
11	57465131	57466505	1336	MED19
11	57468271	57468530	1337	MED19
11	57545286	57546992	1338	CTNND1
11	57567832	57568269	1339	CTNND1
11	59523532	59535406	1340	STX3
11	59567842	59570214	1341	MRPL16
11	60917530	60920574	1342	VPS37C
11	60925601	60926995	1343	VPS37C
11	60927786	60927915	1344	VPS37C
11	60929916	60929931	1345	VPS37C
11	61133954	61135777	1346	CYB561A3
11	61412992	61413338	1347	RPLP0P2
11	61588990	61589300	1348	FADS1
11	61593773	61594504	1349	FADS2
11	61736132	61736398	1350	FTH1
11	61917883	61919145	1351	INCENP
11	62162489	62163030	1352	SCGB1A1
11	62319691	62321220	1353	AHNAK
11	62342460	62343600	1354	EEF1G
11	62360109	62360604	1355	TUT1
11	62366182	62367256	1356	MTA2
11	62388333	62388646	1357	B3GAT3
11	62433894	62435158	1358	SNORA57
11	62437120	62438125	1359	UQCC3
11	62472222	62472786	1360	BSCL2
11	62478091	62478145	1361	BSCL2
11	62537040	62537774	1362	TAF6L
11	62553564	62553873	1363	TMEM179B
11	62625209	62632748	1364	SLC3A2
11	62641627	62645335	1365	SLC3A2
11	62646593	62647343	1366	SLC3A2
11	63466589	63467303	1367	RTN3
11	63676730	63679133	1368	RCOR2
11	63685316	63687844	1369	RCOR2
11	63774911	63775986	1370	OTUB1
11	63828583	63828946	1371	FLRT1
11	63898381	63901299	1372	FLRT1
11	63911818	63914004	1373	MACROD1
11	63947437	63950009	1374	STIP1
11	63951043	63951743	1375	STIP1
11	64015526	64015575	1376	LOC105369340
11	64547316	64547615	1377	SF1
11	64903003	64903743	1378	SYVN1
11	65044875	65045851	1379	POLA2
11	65184989	65189268	1380	NEAT1
11	65235363	65236525	1381	MALAT1
11	65252600	65264232	1382	MALAT1
11	65326699	65327601	1383	LTBP3
11	65419619	65421482	1384	RELA
11	65431443	65432154	1385	RELA
11	65818656	65818815	1386	SF3B2
11	65835678	65836823	1387	PACS1
11	65899927	65900230	1388	PACS1
11	65958196	65960077	1389	KLC2
11	65989394	65990115	1390	KLC2
11	66226588	66227598	1391	PELI3
11	66403932	66405087	1392	RBM4
11	66883240	66885739	1393	KDM2A
11	66979443	66980351	1394	KDM2A
11	67006445	67006505	1395	KDM2A
11	67055135	67055761	1396	ANKRD13D
11	67273843	67274068	1397	PITPNM1
11	67291899	67291995	1398	CABP2
11	67349916	67350065	1399	GSTP1
11	67369836	67373176	1400	C11orf72
11	67525208	67530904	1401	FAM86C2P
11	67557136	67558363	1402	FAM86C2P
11	67571794	67571806	1403	FAM86C2P
11	67573807	67575773	1404	FAM86C2P
11	67592904	67595073	1405	FAM86C2P
11	67652150	67654438	1406	FAM86C2P
11	70670596	70671782	1407	SHANK2-AS3
11	71422861	71423090	1408	FAM86C1
11	71496397	71497556	1409	FAM86C1
11	71651209	71652391	1410	RNF121
11	71758774	71761156	1411	LRTOMT
11	71789576	71790376	1412	LRTOMT
11	71797486	71802162	1413	NUMA1
11	71821720	71822277	1414	ANAPC15
11	72019156	72019801	1415	PHOX2A
11	72339792	72341435	1416	PDE2A
11	72412699	72415394	1417	ARAP1
11	72436466	72437317	1418	ARAP1
11	72505750	72505883	1419	STARD10
11	72546667	72547716	1420	ATG16L2
11	72614926	72615275	1421	ATG16L2
11	72854143	72855083	1422	FCHSD2
11	73126710	73128106	1423	RELT
11	73499917	73500120	1424	MRPL48
11	73694889	73695187	1425	UCP2
11	74036568	74037401	1426	P4HA3
11	74153956	74154855	1427	KCNE3
11	74335643	74336641	1428	POLD3
11	74383636	74385327	1429	CHRDL2
11	74385950	74388109	1430	CHRDL2
11	75024221	75024956	1431	ARRB1
11	75131116	75132920	1432	KLHL35
11	75179413	75184085	1433	KLHL35
11	75198277	75199985	1434	GDPD5
11	75216951	75221094	1435	GDPD5
11	75229711	75230777	1436	GDPD5
11	75342840	75351836	1437	MAP6
11	75366280	75367236	1438	MAP6
11	75656354	75657855	1439	UVRAG
11	75842243	75843371	1440	WNT11
11	76504075	76505441	1441	TSKU
11	76541223	76542513	1442	ACER3
11	76882503	76883852	1443	MYO7A
11	77165947	77166131	1444	PAK1
11	77706717	77706953	1445	INTS4
11	77741029	77742970	1446	KCTD14
11	77755534	77756236	1447	KCTD14
11	77759437	77760268	1448	KCTD14
11	77806861	77808030	1449	NDUFC2-KCTD14
11	77815501	77832645	1450	ALG8
11	77903128	77903883	1451	USP35
11	78007568	78007957	1452	GAB2
11	78081340	78083707	1453	GAB2
11	78097313	78099504	1454	GAB2
11	78129868	78129880	1455	GAB2
11	78269839	78272507	1456	NARS2
11	78286909	78286961	1457	NARS2
11	78451033	78452576	1458	NARS2
11	81794960	81795361	1459	FAM181B
11	82718223	82719488	1460	RAB30
11	82743822	82744610	1461	RAB30
11	82763106	82764001	1462	SNORA70E
11	83690244	83691167	1463	DLG2
11	84175764	84176669	1464	DLG2
11	85340617	85341664	1465	TMEM126B
11	85882408	85885601	1466	EED
11	85898004	85898737	1467	EED
11	85903104	85904617	1468	EED
11	86380567	86381130	1469	ME3
11	86389708	86390470	1470	ME3
11	87128676	87129683	1471	LOC105369423
11	88980427	88981790	1472	TYR
11	90470218	90471047	1473	DISC1FP1
11	90507980	90508659	1474	DISC1FP1
11	94188612	94192190	1475	MRE11A
11	94233202	94234277	1476	ANKRD49
11	94582668	94583509	1477	AMOTL1
11	94590769	94592153	1478	AMOTL1
11	94962029	94962349	1479	LOC100129203
11	94986828	94988616	1480	SESN3
11	95068730	95072613	1481	SESN3
11	95297913	95300487	1482	FAM76B
11	95567873	95568665	1483	CEP57
11	95744882	95746137	1484	MTMR2
11	95754079	95757751	1485	MTMR2
11	95787595	95789033	1486	MTMR2
11	95910302	95912984	1487	MAML2
11	95968917	95973129	1488	MAML2
11	95995448	95996157	1489	MAML2
11	96011197	96012033	1490	MAML2
11	96040234	96041131	1491	MAML2
11	96060894	96063269	1492	MAML2
11	96064920	96066211	1493	MAML2
11	97656986	97658431	1494	CNTN5
11	98501382	98502057	1495	CNTN5
11	99703490	99704092	1496	CNTN5
11	100499760	100500754	1497	ARHGAP42
11	100501579	100502446	1498	ARHGAP42
11	100545608	100546529	1499	ARHGAP42
11	100590079	100590909	1500	LOC100128386
11	100624405	100625034	1501	LOC100128386
11	100630581	100633461	1502	LOC100128386
11	100639649	100640503	1503	LOC100128386
11	102328031	102330262	1504	TMEM123
11	104405082	104408362	1505	LOC102723895
11	104608924	104609892	1506	LOC102723895
11	106562307	106563380	1507	GUCY1A2
11	106860319	106862328	1508	GUCY1A2
11	106865264	106867852	1509	GUCY1A2
11	108337038	108337257	1510	C11orf65
11	108367801	108368158	1511	KDELC2
11	108837660	108839288	1512	DDX10
11	108846151	108847008	1513	DDX10
11	108982426	108984695	1514	C11orf87
11	108990670	108991487	1515	C11orf87
11	109755457	109756365	1516	ZC3H12C
11	110779331	110781611	1517	ARHGAP20
11	111605485	111607346	1518	PPP2R1B
11	111656375	111657173	1519	PPP2R1B
11	111796077	111796867	1520	DIXDC1
11	111806193	111806926	1521	DIXDC1
11	111808927	111809635	1522	DIXDC1
11	111834023	111835531	1523	DIXDC1
11	112618851	112621013	1524	LOC387810
11	112647348	112650105	1525	NCAM1
11	112655254	112655443	1526	NCAM1
11	112676307	112680355	1527	NCAM1
11	112692571	112694524	1528	NCAM1
11	112704504	112707278	1529	NCAM1
11	112843599	112845471	1530	LOC101928847
11	113104300	113104903	1531	NCAM1-AS1
11	113243689	113245392	1532	ANKK1
11	113452416	113453015	1533	DRD2
11	113747292	113747303	1534	USP28
11	114033310	114034685	1535	ZBTB16
11	114062813	114064446	1536	NNMT
11	114091639	114092142	1537	NNMT
11	114098416	114101256	1538	NNMT
11	114646403	114647090	1539	NXPE2
11	115038390	115041800	1540	LOC105369509
11	115050273	115051595	1541	LOC105369509
11	115054023	115055875	1542	LOC105369509
11	115056339	115062477	1543	LOC105369509
11	115069972	115074416	1544	LOC105369509
11	115076542	115079855	1545	LOC105369509
11	115096252	115096767	1546	LOC105369509
11	115111959	115115692	1547	LOC105369509
11	115117159	115123030	1548	LOC105369509
11	115123443	115123514	1549	LOC105369509
11	115141570	115143140	1550	LOC105369509
11	115195225	115197627	1551	LOC105369509
11	115265696	115266473	1552	LOC105369507
11	115268474	115269082	1553	LOC105369507
11	115279285	115281178	1554	LOC105369507
11	115313070	115314382	1555	LOC105369507
11	115318716	115321112	1556	LOC105369507
11	115326766	115328826	1557	CADM1
11	115428694	115429225	1558	CADM1
11	115477049	115479511	1559	CADM1
11	115507733	115508359	1560	LOC101928985
11	115547694	115548301	1561	LOC101928985
11	115565238	115568285	1562	LOC101928985
11	115676219	115677640	1563	LINC00900
11	115741979	115742917	1564	LINC00900
11	115904880	115907669	1565	LINC00900
11	116042366	116048820	1566	LINC00900
11	116049547	116053246	1567	LINC00900
11	116114994	116115829	1568	LOC101929011
11	116146171	116150361	1569	LOC101929011
11	116180886	116185179	1570	LOC101929011
11	116231793	116233552	1571	LOC101929011
11	116240752	116247142	1572	LOC101929011
11	116256576	116259122	1573	LOC101929011
11	116271457	116275870	1574	LOC101929011
11	116283834	116286070	1575	LOC101929011
11	116288726	116295062	1576	LOC101929011
11	116297623	116300201	1577	LOC101929011
11	116322509	116339643	1578	LOC101929011
11	116343010	116355078	1579	LOC101929011
11	116357592	116357844	1580	LOC101929011
11	116368238	116373612	1581	LOC101929011
11	116375131	116377848	1582	LOC101929011
11	116380890	116382955	1583	LOC101929011
11	116404965	116410272	1584	LOC101929011
11	116483001	116485298	1585	LOC101929011
11	116877449	116877982	1586	SIK3
11	116915345	116918117	1587	SIK3
11	116921523	116926535	1588	SIK3
11	116939494	116943859	1589	SIK3
11	116945884	116950706	1590	SIK3
11	116970131	116970264	1591	SIK3
11	116979472	116980291	1592	SIK3
11	117153518	117156423	1593	BACE1-AS
11	117199571	117199926	1594	CEP164
11	117204734	117206370	1595	CEP164
11	117244556	117245790	1596	CEP164
11	117297999	117299068	1597	CEP164
11	117314061	117316832	1598	CEP164
11	117327025	117330691	1599	CEP164
11	117362641	117364489	1600	CEP164
11	117382693	117382786	1601	CEP164
11	117383652	117383945	1602	CEP164
11	117398593	117399547	1603	CEP164
11	117409287	117410042	1604	CEP164
11	117417169	117418415	1605	CEP164
11	117441091	117442323	1606	DSCAML1
11	117469630	117473173	1607	DSCAML1
11	117489352	117491928	1608	DSCAML1
11	117501813	117505848	1609	DSCAML1
11	117518452	117519505	1610	DSCAML1
11	117533898	117535730	1611	DSCAML1
11	117541698	117542373	1612	DSCAML1
11	117543512	117544100	1613	DSCAML1
11	117574968	117578845	1614	DSCAML1
11	117579726	117580537	1615	DSCAML1
11	117583284	117585351	1616	DSCAML1
11	117609395	117611493	1617	DSCAML1
11	117612450	117617548	1618	DSCAML1
11	117622968	117625127	1619	DSCAML1
11	117655684	117657609	1620	DSCAML1
11	117658945	117660645	1621	DSCAML1
11	117678989	117680218	1622	DSCAML1
11	117685014	117687986	1623	FXYD2
11	118778275	118780416	1624	BCL9L
11	118784587	118785673	1625	BCL9L
11	118786475	118787772	1626	BCL9L
11	118792541	118792854	1627	BCL9L
11	118846501	118847626	1628	FOXR1
11	118991195	118991232	1629	HINFP
11	119014669	119018749	1630	ABCG4
11	119203065	119203655	1631	RNF26
11	119223367	119224809	1632	MFRP
11	119235892	119244477	1633	USP2
11	119245838	119247721	1634	USP2
11	119248577	119249888	1635	USP2
11	119496532	119499153	1636	NECTIN1
11	119572162	119573989	1637	NECTIN1
11	119579486	119586430	1638	NECTIN1
11	119733863	119735886	1639	LOC102724301
11	119776824	119779953	1640	LOC102724301
11	120202104	120202873	1641	ARHGEF12
11	120261694	120263274	1642	ARHGEF12
11	120282220	120282919	1643	ARHGEF12
11	120283868	120286457	1644	ARHGEF12
11	120617620	120619553	1645	LOC105369532
11	120700572	120702078	1646	LOC105369532
11	120889149	120890729	1647	TBCEL
11	121259927	121261064	1648	SORL1
11	122035530	122037247	1649	BLID
11	122927575	122928025	1650	HSPA8
11	122952788	122955326	1651	HSPA8
11	122973819	122974036	1652	HSPA8
11	123104044	123104565	1653	CLMP
11	123172235	123173573	1654	CLMP
11	123188677	123190206	1655	CLMP
11	123213060	123217272	1656	CLMP
11	123218229	123218888	1657	CLMP
11	123221162	123224799	1658	CLMP
11	123241799	123242212	1659	GRAMD1B
11	123243498	123246051	1660	GRAMD1B
11	123286372	123289508	1661	GRAMD1B
11	123304588	123307001	1662	GRAMD1B
11	123307979	123309183	1663	GRAMD1B
11	123313891	123315906	1664	GRAMD1B
11	123320501	123322020	1665	GRAMD1B
11	123339290	123342012	1666	GRAMD1B
11	123342799	123349305	1667	GRAMD1B
11	123374727	123378517	1668	GRAMD1B
11	123381203	123382683	1669	GRAMD1B
11	123389194	123390745	1670	GRAMD1B
11	123395329	123395343	1671	GRAMD1B
11	123419819	123421494	1672	GRAMD1B
11	123499448	123502804	1673	SCN3B
11	123526783	123527138	1674	SCN3B
11	123613391	123613520	1675	ZNF202
11	124060707	124061848	1676	OR8G2
11	124709096	124714173	1677	ROBO3
11	124732584	124734304	1678	ROBO3
11	124768831	124770349	1679	ROBO4
11	125151608	125152323	1680	PKNOX2
11	125240123	125242350	1681	LOC403312
11	125885556	125886140	1682	CDON
11	125982911	125985948	1683	CDON
11	125999655	126000942	1684	CDON
11	126003479	126004284	1685	CDON
11	126228944	126230203	1686	ST3GAL4
11	126322324	126322726	1687	ST3GAL4
11	126349857	126350777	1688	ST3GAL4
11	126793748	126795203	1689	KIRREL3-AS2
11	126824851	126825498	1690	KIRREL3-AS2
11	128532888	128534022	1691	FLI1
11	129837961	129840379	1692	PRDM10
11	129873730	129874157	1693	PRDM10
11	131684697	131686495	1694	NTM
11	132562055	132565734	1695	OPCML
11	132640165	132641985	1696	OPCML
11	132705053	132706520	1697	OPCML
11	133808539	133809160	1698	IGSF9B
11	133816318	133821912	1699	IGSF9B
11	133903167	133912041	1700	LOC100128239
11	133920303	133925814	1701	JAM3
11	134068584	134069217	1702	NCAPD3
11	134215877	134216771	1703	GLB1L2
11	134401236	134403329	1704	LOC283177
11	134723318	134726896	1705	LOC100507548
11	134876326	134878538	1706	LOC100507548
12	65260	66606	1707	FAM138D
12	68607	69527	1708	FAM138D
12	84916	85912	1709	LOC100288778
12	91220	94348	1710	LOC100288778
12	147695	150954	1711	IQSEC3
12	193220	194127	1712	IQSEC3
12	248527	249265	1713	LOC574538
12	499621	499750	1714	KDM5A
12	578917	579858	1715	B4GALNT3
12	679849	681665	1716	LOC105369595
12	700694	701746	1717	LOC105369595
12	1123315	1123566	1718	ERC1
12	1143711	1144934	1719	ERC1
12	1156792	1158394	1720	ERC1
12	1427557	1427968	1721	LINC00942
12	1466299	1467460	1722	LINC00942
12	1715195	1715545	1723	WNT5B
12	1751709	1755348	1724	WNT5B
12	1759027	1760183	1725	WNT5B
12	1799093	1799246	1726	ADIPOR2
12	1885275	1886302	1727	LRTM2
12	2028870	2029044	1728	CACNA2D4
12	2033574	2034480	1729	CACNA2D4
12	2042452	2043151	1730	LINC00940
12	2048777	2049199	1731	LINC00940
12	2280135	2282791	1732	CACNA1C-AS4
12	2664505	2665271	1733	CACNA1C-AS2
12	2955598	2955868	1734	LOC100507424
12	2987365	2987867	1735	RHNO1
12	3212884	3214954	1736	TSPAN9
12	3215780	3217042	1737	TSPAN9
12	3247299	3247543	1738	TSPAN9
12	3247881	3252871	1739	TSPAN9
12	3258926	3261260	1740	TSPAN9
12	3274103	3275533	1741	TSPAN9
12	3320072	3325305	1742	TSPAN9
12	3326594	3329841	1743	TSPAN9
12	3333650	3336469	1744	TSPAN9
12	3340755	3341229	1745	PRMT8
12	3351208	3357967	1746	PRMT8
12	3361162	3362572	1747	PRMT8
12	3401346	3405595	1748	PRMT8
12	3449587	3452576	1749	PRMT8
12	3603793	3605051	1750	THCAT155
12	3683535	3685277	1751	THCAT155
12	3712754	3716477	1752	THCAT155
12	3718712	3720151	1753	THCAT155
12	3793917	3795856	1754	CRACR2A
12	3813550	3814890	1755	CRACR2A
12	4099244	4100725	1756	PARP11
12	4386350	4390815	1757	CCND2-AS1
12	4391613	4408587	1758	CCND2-AS1
12	4410675	4424606	1759	TIGAR
12	4431359	4442261	1760	TIGAR
12	4526299	4530369	1761	FGF6
12	4550118	4551586	1762	FGF6
12	4719090	4720863	1763	DYRK4
12	4787829	4788935	1764	NDUFA9
12	5147400	5149577	1765	KCNA5
12	5150556	5150900	1766	KCNA5
12	5154085	5154123	1767	KCNA5
12	5170307	5173095	1768	KCNA5
12	5176861	5178790	1769	KCNA5
12	5190126	5191541	1770	KCNA5
12	5333603	5334630	1771	LOC101929584
12	5489218	5492584	1772	NTF3
12	5504656	5505807	1773	NTF3
12	5596735	5597994	1774	NTF3
12	5720710	5722825	1775	NTF3
12	5732313	5733453	1776	NTF3
12	5796588	5799843	1777	NTF3
12	6011100	6015364	1778	ANO2
12	6018887	6023594	1779	ANO2
12	6031187	6035943	1780	ANO2
12	6559071	6559682	1781	CD27-AS1
12	6562177	6562855	1782	TAPBPL
12	6640731	6642570	1783	GAPDH
12	6645385	6645647	1784	GAPDH
12	6661964	6663510	1785	IFFO1
12	6711788	6714462	1786	CHD4
12	6717599	6718801	1787	CHD4
12	6719754	6727462	1788	CHD4
12	6741815	6742473	1789	LPAR5
12	6863636	6865234	1790	MLF2
12	6866693	6870104	1791	MLF2
12	6871655	6874540	1792	PTMS
12	6886819	6889969	1793	LAG3
12	6928695	6929962	1794	GPR162
12	6931963	6935262	1795	GPR162
12	6935866	6936537	1796	P3H3
12	6938538	6949017	1797	P3H3
12	6951018	6960229	1798	GNB3
12	6962291	6963642	1799	USP5
12	6978278	6978887	1800	TPI1
12	6981265	6981448	1801	SPSB2
12	6994846	6996505	1802	DSTNP2
12	7011357	7012896	1803	LRRC23
12	7022518	7022613	1804	ENO2
12	7034626	7036479	1805	ATN1
12	7051407	7051600	1806	C12orf57
12	7053980	7054452	1807	C12orf57
12	7265113	7266897	1808	C1RL
12	8233496	8233806	1809	NECAP1
12	8239981	8241596	1810	NECAP1
12	9065670	9066315	1811	PHC1
12	12511013	12512254	1812	BORCS5
12	12850121	12850753	1813	GPR19
12	12857215	12858038	1814	GPR19
12	12894302	12895278	1815	APOLD1
12	12896166	12900546	1816	APOLD1
12	12944797	12945766	1817	APOLD1
12	13098284	13100382	1818	GPRC5D
12	13245312	13247739	1819	GSG1
12	14391507	14394390	1820	ATF7IP
12	14396683	14398624	1821	ATF7IP
12	14409062	14413579	1822	ATF7IP
12	14536124	14536997	1823	ATF7IP
12	14546436	14548384	1824	ATF7IP
12	14555776	14557696	1825	ATF7IP
12	14568813	14572432	1826	ATF7IP
12	14651034	14651786	1827	PLBD1-AS1
12	14779882	14781330	1828	PLBD1
12	14925065	14925510	1829	HIST4H4
12	14947916	14955400	1830	WBP11
12	15030872	15032602	1831	MGP
12	15036171	15037852	1832	MGP
12	15046176	15047101	1833	MGP
12	15049184	15050451	1834	MGP
12	15109327	15111066	1835	ARHGDIB
12	15121208	15122141	1836	PDE6H
12	15126956	15127269	1837	PDE6H
12	15339117	15340403	1838	RERG
12	15508901	15510412	1839	PTPRO
12	15512724	15513590	1840	PTPRO
12	15540535	15543032	1841	PTPRO
12	15636044	15637113	1842	PTPRO
12	15693095	15694428	1843	PTPRO
12	15703487	15703781	1844	PTPRO
12	15878832	15881682	1845	EPS8
12	15946952	15947875	1846	EPS8
12	16006725	16009300	1847	STRAP
12	16034095	16034287	1848	STRAP
12	16938406	16940583	1849	LMO3
12	16941065	16941743	1850	LMO3
12	17012737	17013012	1851	SKP1P2
12	17033399	17035959	1852	SKP1P2
12	17101735	17103534	1853	SKP1P2
12	18306779	18307346	1854	RERGL
12	19332794	19334315	1855	PLEKHA5
12	19343753	19345997	1856	PLEKHA5
12	19380175	19381825	1857	PLEKHA5
12	21490317	21492880	1858	SLCO1A2
12	21566386	21567324	1859	SLCO1A2
12	21582543	21583746	1860	PYROXD1
12	21704476	21705927	1861	SPX
12	21794442	21799105	1862	LDHB
12	21879139	21879733	1863	KCNJ8
12	22610753	22611455	1864	C2CD5
12	23114845	23116784	1865	LOC101928441
12	23717172	23718031	1866	SOX5
12	23840590	23841197	1867	SOX5
12	25153240	25154655	1868	LOC645177
12	26019259	26019621	1869	RASSF8-AS1
12	26138021	26142231	1870	RASSF8
12	26675545	26677405	1871	ITPR2
12	26745988	26747462	1872	ITPR2
12	27443340	27444365	1873	ARNTL2
12	31123344	31123837	1874	TSPAN11
12	31452589	31455147	1875	FLJ13224
12	31757273	31759515	1876	DENND5B
12	32271782	32274410	1877	BICD1
12	32290132	32296070	1878	BICD1
12	32303897	32305066	1879	BICD1
12	32307240	32315079	1880	BICD1
12	32392788	32394569	1881	BICD1
12	32437747	32440044	1882	BICD1
12	32457354	32459075	1883	FGD4
12	32459926	32461175	1884	FGD4
12	32462964	32463430	1885	FGD4
12	32651412	32653976	1886	FGD4
12	32825245	32825771	1887	DNM1L
12	34272604	34272898	1888	ALG10
12	39436035	39438276	1889	CPNE8
12	39688184	39689397	1890	KIF21A
12	41040435	41041534	1891	CNTN1
12	41083705	41085243	1892	CNTN1
12	41091224	41092365	1893	CNTN1
12	41120073	41120344	1894	CNTN1
12	41212324	41214099	1895	CNTN1
12	48156150	48157712	1896	RAPGEF3
12	48175461	48176074	1897	SLC48A1
12	48383918	48386935	1898	COL2A1
12	48391439	48392963	1899	COL2A1
12	49068911	49070413	1900	KANSL2
12	49246957	49247097	1901	DDX23
12	49526304	49527904	1902	TUBA1B
12	49584107	49585825	1903	TUBA1A
12	49592091	49597331	1904	TUBA1A
12	49606562	49612987	1905	TUBA1C
12	49614216	49620708	1906	TUBA1C
12	49622709	49629176	1907	TUBA1C
12	49812377	49814514	1908	LOC100335030
12	49839705	49841059	1909	LOC100335030
12	49971856	49973263	1910	MCRS1
12	50064935	50068564	1911	FMNL3
12	50083184	50083627	1912	FMNL3
12	50310797	50311555	1913	LOC101927292
12	50370430	50384824	1914	AQP6
12	50403197	50403803	1915	RACGAP1
12	50409776	50412364	1916	RACGAP1
12	50414187	50416816	1917	RACGAP1
12	50420340	50422432	1918	RACGAP1
12	50426111	50428394	1919	RACGAP1
12	50443203	50446062	1920	ASIC1
12	50503265	50504763	1921	COX14
12	50509764	50510724	1922	COX14
12	50513173	50517346	1923	COX14
12	50614932	50615487	1924	LIMA1
12	50617488	50618643	1925	LIMA1
12	50914381	50915426	1926	DIP2B
12	50921974	50923088	1927	DIP2B
12	51317357	51317533	1928	METTL7A
12	51418429	51418923	1929	SLC11A2
12	51577138	51579036	1930	TFCP2
12	51579667	51580818	1931	POU6F1
12	51610311	51610476	1932	POU6F1
12	51612477	51612816	1933	POU6F1
12	52090307	52092325	1934	SCN8A
12	52170540	52172047	1935	FIGNL2
12	52268125	52268853	1936	ANKRD33
12	52422764	52424436	1937	NR4A1
12	52425641	52427774	1938	NR4A1
12	52474480	52475838	1939	OR7E47P
12	53573257	53573429	1940	CSAD
12	53629078	53629995	1941	RARG
12	53634828	53636653	1942	MFSD5
12	53808622	53810222	1943	AMHR2
12	53834060	53834432	1944	PRR13
12	53846886	53852056	1945	PCBP2
12	53885295	53887986	1946	MAP3K12
12	53926959	53927576	1947	LOC100652999
12	53979154	53980141	1948	ATF7
12	53994119	53996330	1949	ATF7
12	54021199	54021340	1950	ATF7
12	54071512	54073407	1951	ATP5G2
12	54526717	54530535	1952	LOC400043
12	54554575	54561688	1953	SMUG1
12	54566759	54568076	1954	SMUG1
12	54648725	54649490	1955	CBX5
12	54650555	54652328	1956	CBX5
12	54654370	54657033	1957	CBX5
12	54722202	54724574	1958	COPZ1
12	54734490	54736265	1959	LOC102724050
12	54742620	54746474	1960	LOC102724050
12	54748475	54755149	1961	LOC102724050
12	55411057	55412275	1962	NEUROD4
12	55427845	55428582	1963	NEUROD4
12	55438523	55439170	1964	NEUROD4
12	55451005	55451372	1965	NEUROD4
12	55453100	55455597	1966	NEUROD4
12	55461421	55462679	1967	NEUROD4
12	56111076	56112628	1968	BLOC1S1
12	56124457	56125048	1969	CD63
12	56135921	56136063	1970	GDF11
12	56138064	56140878	1971	GDF11
12	56434324	56434685	1972	RPS26
12	56509184	56509373	1973	RPL41
12	56547204	56549243	1974	MYL6B
12	56549974	56551044	1975	MYL6
12	56616753	56617124	1976	RNF41
12	56695175	56696161	1977	CS
12	56842155	56842199	1978	TIMELESS
12	56844200	56845231	1979	TIMELESS
12	57031163	57031823	1980	BAZ2A
12	57600652	57603326	1981	NXPH4
12	57619845	57621365	1982	SHMT2
12	57635475	57638251	1983	NDUFA4L2
12	57654860	57656560	1984	STAC3
12	57666013	57667373	1985	STAC3
12	57878915	57880735	1986	MARS
12	57883597	57883760	1987	ARHGAP9
12	57911969	57912041	1988	DDIT3
12	57915300	57915658	1989	DDIT3
12	57917659	57918332	1990	MBD6
12	57999405	57999463	1991	DTX3
12	58000777	58002814	1992	ARHGEF25
12	58006218	58006626	1993	ARHGEF25
12	58147230	58147880	1994	CDK4
12	58155553	58156370	1995	CYP27B1
12	59280814	59283313	1996	LRIG3
12	59308206	59312326	1997	LRIG3
12	63211361	63212232	1998	PPM1H
12	65076074	65077893	1999	RASSF3
[truncated: 7,622 more rows]
