# Supplementary material for: OTX2 Activity at Distal Regulatory Elements Shapes the Chromatin Landscape of Group 3 Medulloblastoma
Source: Oxford University Press journal article supplement (doi:10.1158/2159-8290.cd-16-0844), 2017-02-18
Supplement: 21598290cd160844-sup-169828_2_supp_3788637_nndtfx.xlsx [file 21598290cd160844-sup-169828_2_supp_3788637_nndtfx.xlsx]

## Sheet: TableS2.txt
chr	peak_start	peak_end	peak_id	Nearest Gene
1	35247	35408	1	FAM138A
1	35491	35783	2	FAM138A
1	35983	36433	3	FAM138A
1	114788	115061	4	LOC729737
1	124056	124255	5	LOC729737
1	154162	154331	6	LOC729737
1	261108	261404	7	LOC100132062
1	339104	339309	8	LOC100132062
1	348287	348584	9	OR4F29
1	410704	410948	10	OR4F29
1	419288	419534	11	OR4F29
1	425071	425284	12	OR4F29
1	428860	429042	13	OR4F29
1	430845	431009	14	OR4F29
1	553575	553786	15	LOC101928626
1	555533	555732	16	LOC101928626
1	559337	559502	17	LOC101928626
1	579534	579736	18	LOC101928626
1	641195	641402	19	OR4F29
1	650398	650599	20	LOC100133331
1	689843	690051	21	LOC100288069
1	868930	869236	22	SAMD11
1	877220	877349	23	SAMD11
1	1205227	1205393	24	UBE2J2
1	1310609	1310957	25	AURKAIP1
1	1624615	1624865	26	SLC35E2B
1	1677963	1678137	27	SLC35E2
1	1708739	1708880	28	NADK
1	1740316	1740452	29	NADK
1	1740844	1741324	30	NADK
1	1742139	1742292	31	NADK
1	1758213	1758618	32	NADK
1	1758825	1759202	33	NADK
1	1763700	1763977	34	NADK
1	1771112	1771342	35	GNB1
1	1778532	1779404	36	GNB1
1	1790558	1791006	37	GNB1
1	1801731	1802087	38	GNB1
1	1814917	1815180	39	GNB1
1	1818431	1818812	40	GNB1
1	1820928	1821082	41	GNB1
1	2088289	2088578	42	FAAP20
1	2396949	2397277	43	PLCH2
1	2407556	2407836	44	PLCH2
1	3839910	3840143	45	LINC01134
1	3840748	3841065	46	LINC01134
1	3844727	3844871	47	LINC01134
1	3998779	3998904	48	LINC01346
1	4008526	4008668	49	LINC01346
1	4041316	4041588	50	LINC01346
1	4054068	4054300	51	LINC01346
1	4131653	4131934	52	LINC01346
1	4262712	4263019	53	LOC284661
1	4310351	4310630	54	LOC284661
1	5285753	5286282	55	AJAP1
1	5355979	5356508	56	AJAP1
1	5357502	5357870	57	AJAP1
1	5364838	5365136	58	AJAP1
1	5371664	5371994	59	AJAP1
1	5374461	5374668	60	AJAP1
1	5434225	5434466	61	KCNAB2
1	5436389	5436711	62	KCNAB2
1	5761132	5761296	63	KCNAB2
1	5831356	5831590	64	KCNAB2
1	6063925	6064169	65	NPHP4
1	6258216	6258399	66	RPL22
1	6265323	6265590	67	LOC102724450
1	6457883	6458047	68	ACOT7
1	6720523	6720688	69	THAP3
1	6883290	6883464	70	CAMTA1
1	6883881	6884027	71	CAMTA1
1	6925542	6925800	72	CAMTA1
1	6938137	6938595	73	CAMTA1
1	6950188	6950457	74	CAMTA1
1	6972087	6972441	75	CAMTA1
1	7008179	7009359	76	CAMTA1
1	7010432	7010684	77	CAMTA1
1	7020492	7021008	78	CAMTA1
1	7177725	7177874	79	CAMTA1
1	7186385	7186552	80	CAMTA1
1	7187679	7188084	81	CAMTA1
1	7269230	7269556	82	CAMTA1
1	7283707	7283959	83	CAMTA1
1	7520964	7521277	84	VAMP3
1	7538576	7538949	85	VAMP3
1	7812603	7812799	86	VAMP3
1	8021492	8021681	87	PARK7
1	8075235	8075432	88	ERRFI1
1	8077644	8078030	89	ERRFI1
1	8082800	8082963	90	ERRFI1
1	8115243	8115491	91	ERRFI1
1	8151645	8151824	92	ERRFI1
1	8157679	8157994	93	ERRFI1
1	8433916	8434178	94	RERE
1	8471903	8472091	95	RERE
1	8472425	8472687	96	RERE
1	8474565	8474798	97	RERE
1	8563676	8563882	98	SNORD128
1	8577204	8577594	99	SNORD128
1	8582446	8582740	100	SNORD128
1	8586187	8586271	101	SNORD128
1	8590118	8590440	102	SNORD128
1	8596256	8596571	103	SNORD128
1	8621362	8621531	104	SNORD128
1	8622697	8623068	105	SNORD128
1	8638329	8638523	106	SNORD128
1	8643159	8643323	107	SNORD128
1	8646787	8647064	108	SNORD128
1	8652522	8652688	109	SNORD128
1	8659483	8660019	110	SNORD128
1	8672251	8672572	111	SNORD128
1	8689263	8689532	112	SNORD128
1	8711396	8711774	113	SNORD128
1	8721736	8722538	114	RERE
1	8729378	8729528	115	RERE
1	8729600	8730035	116	RERE
1	8741654	8742360	117	RERE
1	8747609	8748192	118	RERE
1	8748889	8748989	119	RERE
1	8760990	8761180	120	RERE
1	8763572	8763840	121	RERE
1	8807650	8807899	122	RERE
1	8825222	8825536	123	RERE
1	8842037	8842422	124	RERE
1	8862402	8862771	125	RERE
1	8863853	8864280	126	RERE
1	8874260	8874522	127	RERE
1	8874955	8875254	128	RERE
1	8882216	8882387	129	RERE
1	8882769	8882994	130	RERE
1	8915665	8915938	131	ENO1
1	8943176	8943488	132	ENO1
1	9140756	9140980	133	SLC2A5
1	9157289	9157453	134	SLC2A5
1	9185739	9186035	135	GPR157
1	9278211	9278411	136	H6PD
1	9290038	9290291	137	H6PD
1	9386773	9386989	138	SPSB1
1	9431431	9431638	139	LOC100506022
1	9434814	9435342	140	LOC100506022
1	9462482	9462600	141	LOC100506022
1	9489064	9489143	142	LOC100506022
1	9514032	9514194	143	LOC100506022
1	9565466	9565726	144	SLC25A33
1	9585231	9585377	145	SLC25A33
1	9611990	9612382	146	SLC25A33
1	9619417	9619594	147	SLC25A33
1	9621542	9621857	148	SLC25A33
1	9627571	9627756	149	TMEM201
1	9629972	9630076	150	TMEM201
1	9640013	9640250	151	TMEM201
1	9648346	9648600	152	TMEM201
1	9653436	9653758	153	TMEM201
1	9676245	9676451	154	TMEM201
1	9683757	9683933	155	PIK3CD
1	9844770	9844973	156	CLSTN1
1	9858456	9858916	157	CLSTN1
1	9863028	9863461	158	CLSTN1
1	9871399	9871995	159	CLSTN1
1	9872106	9872362	160	CLSTN1
1	9877673	9877838	161	CLSTN1
1	9885812	9886070	162	CLSTN1
1	9900229	9900535	163	CLSTN1
1	9902040	9902324	164	CLSTN1
1	9902973	9903167	165	CLSTN1
1	9951396	9951676	166	CTNNBIP1
1	10010598	10010839	167	NMNAT1
1	10011717	10012186	168	NMNAT1
1	10019022	10019182	169	NMNAT1
1	10022501	10022744	170	NMNAT1
1	10082090	10082362	171	UBE4B
1	10111846	10112003	172	UBE4B
1	10158570	10158872	173	UBE4B
1	10200744	10200940	174	KIF1B
1	10209382	10209658	175	KIF1B
1	10215264	10215542	176	KIF1B
1	10253640	10253819	177	KIF1B
1	10259247	10259414	178	KIF1B
1	10264528	10264662	179	KIF1B
1	10271497	10271681	180	KIF1B
1	10273523	10273687	181	KIF1B
1	10286061	10286315	182	KIF1B
1	10310744	10311156	183	KIF1B
1	10311365	10311693	184	KIF1B
1	10313670	10314406	185	KIF1B
1	10339136	10339394	186	RNU6-2
1	10397574	10397801	187	RNU6-2
1	10402111	10402278	188	RNU6-2
1	10402585	10402844	189	RNU6-2
1	10404848	10405027	190	RNU6-2
1	10437603	10437727	191	PGD
1	10462332	10462607	192	PGD
1	10469340	10469620	193	PGD
1	10480402	10480879	194	APITD1
1	10484340	10484554	195	APITD1
1	10485497	10485723	196	APITD1
1	10532086	10532267	197	DFFA
1	10573918	10574088	198	PEX14
1	10597406	10598080	199	PEX14
1	10598385	10598697	200	PEX14
1	10668877	10669086	201	PEX14
1	10738274	10738517	202	CASZ1
1	10738664	10738979	203	CASZ1
1	10739763	10739975	204	CASZ1
1	10774563	10774829	205	CASZ1
1	10813432	10814052	206	CASZ1
1	10853490	10853675	207	CASZ1
1	10873899	10874035	208	CASZ1
1	11022622	11022886	209	C1orf127
1	11044417	11044690	210	C1orf127
1	11111764	11111908	211	MASP2
1	11164787	11165038	212	LOC105376736
1	11192753	11193013	213	MTOR-AS1
1	11207769	11208081	214	MTOR-AS1
1	11217378	11217685	215	MTOR-AS1
1	11218944	11219268	216	MTOR-AS1
1	11247980	11248260	217	ANGPTL7
1	11273217	11273416	218	ANGPTL7
1	11275080	11275417	219	ANGPTL7
1	11298259	11298533	220	MTOR
1	11322590	11322850	221	MTOR
1	11388572	11388825	222	UBIAD1
1	11435988	11436245	223	UBIAD1
1	11535897	11536075	224	DISP3
1	11547537	11547762	225	DISP3
1	11578766	11579009	226	DISP3
1	11702001	11702189	227	FBXO44
1	11900838	11901141	228	NPPA-AS1
1	11967869	11967943	229	KIAA2013
1	11968002	11968646	230	KIAA2013
1	11969736	11970022	231	KIAA2013
1	12047653	12047871	232	MFN2
1	12063990	12064299	233	MIIP
1	12137191	12137407	234	TNFRSF8
1	12139759	12139904	235	TNFRSF8
1	12374543	12374697	236	VPS13D
1	12430432	12431144	237	SNORA59B
1	12453507	12453740	238	SNORA59B
1	12454591	12454923	239	SNORA59B
1	12476403	12476726	240	SNORA59B
1	12495752	12495854	241	SNORA59B
1	12535563	12535748	242	SNORA59B
1	12570912	12571207	243	SNORA59B
1	12633938	12634188	244	DHRS3
1	12664465	12664629	245	DHRS3
1	12686879	12687033	246	DHRS3
1	12687215	12687675	247	DHRS3
1	13553840	13554261	248	PRAMEF20
1	13778053	13778478	249	PRAMEF20
1	13782853	13783162	250	PRAMEF20
1	13785042	13785272	251	PRAMEF20
1	13791030	13791288	252	LRRC38
1	13814102	13814441	253	LRRC38
1	13819864	13820163	254	LRRC38
1	13841325	13841734	255	LRRC38
1	13863049	13863392	256	LRRC38
1	13877240	13877509	257	PDPN
1	13915786	13916107	258	PDPN
1	13987710	13987898	259	PRDM2
1	13988834	13989411	260	PRDM2
1	14019706	14019890	261	PRDM2
1	14055498	14055626	262	PRDM2
1	14061389	14061905	263	PRDM2
1	14903786	14903966	264	KAZN
1	14986401	14986686	265	KAZN
1	15482270	15482538	266	TMEM51
1	15489707	15490000	267	C1orf195
1	15527151	15527280	268	C1orf195
1	15580771	15581020	269	FHAD1
1	15581076	15581547	270	FHAD1
1	15587230	15587497	271	FHAD1
1	15735963	15736048	272	EFHD2
1	15743497	15743839	273	EFHD2
1	15790886	15791053	274	CELA2A
1	15810347	15810603	275	CELA2B
1	15924993	15925260	276	AGMAT
1	15949249	15949398	277	DDI2
1	15949655	15949836	278	DDI2
1	16142169	16142297	279	UQCRHL
1	16160829	16160951	280	SPEN
1	16165204	16165488	281	SPEN
1	16170183	16170704	282	SPEN
1	16177335	16177636	283	FLJ37453
1	16179105	16179272	284	FLJ37453
1	16444429	16444560	285	EPHA2
1	16479447	16479893	286	EPHA2
1	16575342	16575523	287	RSG1
1	16612685	16612846	288	RSG1
1	16993018	16993417	289	FAM231A
1	17067057	17067447	290	FAM231C
1	17111698	17112145	291	MST1L
1	17222438	17222926	292	LOC105376805
1	17231970	17232044	293	LOC105376805
1	17248327	17248558	294	CROCC
1	17330380	17330563	295	ATP13A2
1	17370970	17371735	296	SDHB
1	17433505	17433729	297	PADI2
1	17449007	17449268	298	PADI2
1	17463512	17463982	299	PADI2
1	17501201	17501316	300	PADI1
1	17853726	17853957	301	ARHGEF10L
1	18433958	18434198	302	IGSF21
1	18460868	18461104	303	IGSF21
1	18461309	18461507	304	IGSF21
1	18464505	18464876	305	IGSF21
1	18502877	18503419	306	IGSF21
1	18510810	18511090	307	IGSF21
1	18517724	18518102	308	IGSF21
1	18520045	18520362	309	IGSF21
1	18526120	18526376	310	IGSF21
1	18530528	18530748	311	IGSF21
1	18561338	18561482	312	IGSF21
1	18583462	18583652	313	IGSF21
1	18671294	18671520	314	KLHDC7A
1	18671576	18671882	315	KLHDC7A
1	18858295	18858493	316	KLHDC7A
1	19034399	19034681	317	PAX7
1	19048877	19049071	318	PAX7
1	19233596	19233786	319	ALDH4A1
1	19288854	19289109	320	IFFO2
1	19405099	19405303	321	IFFO2
1	19422525	19422819	322	UBR4
1	19453578	19453920	323	UBR4
1	19527829	19528234	324	UBR4
1	19567207	19567430	325	EMC1
1	19567602	19567899	326	EMC1
1	19704454	19704767	327	PQLC2
1	19716881	19717036	328	PQLC2
1	19731824	19732515	329	CAPZB
1	19741229	19741533	330	CAPZB
1	19759551	19759724	331	CAPZB
1	19814408	19814601	332	CAPZB
1	19871831	19871976	333	LOC105378614
1	19878514	19878737	334	LOC105378614
1	20050597	20050674	335	HTR6
1	20057256	20057592	336	HTR6
1	20079785	20079919	337	TMCO4
1	20080944	20081269	338	TMCO4
1	20212421	20212554	339	OTUD3
1	20236068	20236318	340	PLA2G2E
1	20961516	20961704	341	PINK1
1	21151985	21152126	342	HP1BP3
1	21301804	21302183	343	EIF4G3
1	21335091	21335318	344	EIF4G3
1	21376640	21377121	345	EIF4G3
1	21430444	21430723	346	EIF4G3
1	21455212	21455354	347	EIF4G3
1	21460544	21460728	348	EIF4G3
1	21580652	21580996	349	ECE1
1	21591470	21591657	350	ECE1
1	21629839	21630050	351	LOC100506801
1	21635320	21635592	352	LOC100506801
1	21662487	21662613	353	ECE1
1	21912800	21913057	354	RAP1GAP
1	22351642	22351938	355	LINC00339
1	22354348	22354578	356	LOC101928043
1	22380105	22380480	357	CDC42
1	22412852	22413097	358	CDC42
1	22429386	22429639	359	WNT4
1	22539268	22539518	360	WNT4
1	22552454	22552613	361	WNT4
1	22788148	22788442	362	ZBTB40
1	22797747	22798015	363	ZBTB40
1	22800274	22800638	364	ZBTB40
1	22814337	22814523	365	ZBTB40
1	22831613	22831846	366	ZBTB40
1	22834251	22834397	367	EPHA8
1	22866515	22866712	368	EPHA8
1	22871735	22871901	369	EPHA8
1	22909501	22909973	370	EPHA8
1	22934426	22934607	371	C1QA
1	22939098	22939537	372	C1QA
1	23090352	23090758	373	EPHB2
1	23121288	23121688	374	EPHB2
1	23128432	23128613	375	EPHB2
1	23134982	23135410	376	EPHB2
1	23171626	23171932	377	LACTBL1
1	23175492	23175727	378	LACTBL1
1	23182529	23182944	379	LACTBL1
1	23197330	23197360	380	LACTBL1
1	23203204	23203369	381	LACTBL1
1	23245204	23245490	382	LACTBL1
1	23297698	23297982	383	LACTBL1
1	23299369	23299571	384	LACTBL1
1	23345700	23345910	385	KDM1A
1	23362476	23362841	386	KDM1A
1	23405894	23406018	387	KDM1A
1	23413598	23413790	388	KDM1A
1	23449040	23449189	389	LUZP1
1	23486613	23487274	390	LUZP1
1	23495874	23496018	391	LUZP1
1	23550660	23550933	392	HTR1D
1	23629070	23629241	393	LINC01355
1	23635153	23635422	394	LINC01355
1	23637980	23638349	395	LINC01355
1	23697427	23697670	396	ZNF436
1	23703961	23704294	397	ZNF436
1	23769437	23769714	398	TCEA3
1	23771594	23771845	399	TCEA3
1	23773351	23773653	400	TCEA3
1	23774092	23774424	401	TCEA3
1	23778686	23778841	402	TCEA3
1	23814085	23814303	403	ASAP3
1	23891078	23891300	404	ID3
1	23897534	23897835	405	ID3
1	23919046	23919230	406	ID3
1	23924260	23924457	407	MDS2
1	23963902	23964099	408	MDS2
1	23965595	23965746	409	MDS2
1	24009477	24009696	410	RPL11
1	24031519	24031713	411	RPL11
1	24152449	24152673	412	HMGCL
1	24170525	24170819	413	HMGCL
1	24171356	24171501	414	HMGCL
1	24246675	24246950	415	CNR2
1	24324664	24324828	416	SRSF10
1	24372295	24372993	417	SRSF10
1	24488790	24489131	418	IL22RA1
1	24525909	24526055	419	LOC284632
1	24571100	24571359	420	LOC284632
1	24616524	24616789	421	GRHL3
1	24627905	24628256	422	GRHL3
1	24628376	24628655	423	GRHL3
1	24644675	24644871	424	GRHL3
1	24691567	24691798	425	GRHL3
1	24740245	24740488	426	STPG1
1	24853785	24853941	427	RCAN3
1	24878831	24879122	428	LOC100506985
1	24881121	24881343	429	LOC100506985
1	24889201	24889695	430	NCMAP
1	24975003	24975254	431	SRRM1
1	25056989	25057235	432	CLIC4
1	25061792	25062736	433	CLIC4
1	25070014	25070171	434	CLIC4
1	25077141	25077275	435	CLIC4
1	25078407	25078596	436	CLIC4
1	25090169	25090388	437	CLIC4
1	25093800	25093947	438	CLIC4
1	25095745	25096012	439	CLIC4
1	25096758	25097102	440	CLIC4
1	25110786	25111129	441	CLIC4
1	25112713	25113038	442	CLIC4
1	25148226	25148671	443	CLIC4
1	25177134	25177392	444	RUNX3
1	25580277	25580598	445	RSRP1
1	25609640	25609791	446	RHD
1	25650407	25650716	447	RSRP1
1	25693702	25693908	448	TMEM50A
1	25736563	25736894	449	RHCE
1	25741430	25741735	450	RHCE
1	25879855	25880154	451	LDLRAP1
1	25885138	25885392	452	LDLRAP1
1	25896614	25896847	453	LDLRAP1
1	25934973	25935154	454	MAN1C1
1	25937241	25937373	455	MAN1C1
1	25945906	25945978	456	MAN1C1
1	25996538	25996824	457	MAN1C1
1	26003040	26003245	458	MAN1C1
1	26111929	26112207	459	SEPN1
1	26112609	26112907	460	SEPN1
1	26160695	26160882	461	LOC646471
1	26222102	26222302	462	STMN1
1	26254398	26254595	463	STMN1
1	26279254	26279349	464	PAFAH2
1	26279468	26279544	465	PAFAH2
1	26279729	26280147	466	PAFAH2
1	26324610	26324950	467	PAFAH2
1	26325923	26326232	468	PAFAH2
1	26492004	26492254	469	ZNF593
1	26508084	26508249	470	CNKSR1
1	26602516	26602688	471	SH3BGRL3
1	26604330	26604529	472	SH3BGRL3
1	26744557	26744797	473	LIN28A
1	26756248	26756480	474	DHDDS
1	26759173	26759335	475	DHDDS
1	26763232	26763434	476	DHDDS
1	26794567	26794677	477	LOC101928324
1	26794927	26795049	478	LOC101928324
1	26796837	26796992	479	HMGN2
1	26925297	26925579	480	RPS6KA1
1	26927049	26927367	481	RPS6KA1
1	26937333	26937676	482	RPS6KA1
1	26943931	26944322	483	RPS6KA1
1	26945735	26945900	484	RPS6KA1
1	27013551	27013747	485	LOC101928728
1	27018694	27019096	486	LOC101928728
1	27019456	27019838	487	LOC101928728
1	27022055	27022228	488	ARID1A
1	27024731	27024866	489	ARID1A
1	27049934	27050290	490	ARID1A
1	27092268	27092617	491	PIGV
1	27095290	27095539	492	PIGV
1	27095810	27096042	493	PIGV
1	27097753	27098029	494	PIGV
1	27159236	27159573	495	ZDHHC18
1	27160550	27160877	496	ZDHHC18
1	27288131	27288334	497	KDF1
1	27307606	27308190	498	TRNP1
1	27323007	27323346	499	TRNP1
1	27344320	27344541	500	FAM46B
1	27423837	27424016	501	SLC9A1
1	27524510	27524789	502	WDTC1
1	27560825	27561124	503	WDTC1
1	27567076	27567266	504	WDTC1
1	27567595	27567773	505	WDTC1
1	27570046	27570452	506	WDTC1
1	27753291	27753520	507	GPR3
1	27816806	27817078	508	WASF2
1	27863381	27863596	509	WASF2
1	28052055	28052353	510	FAM76A
1	28155429	28155617	511	PPP1R8
1	28184687	28184958	512	THEMIS2
1	28201722	28201862	513	THEMIS2
1	28271923	28272204	514	SMPDL3B
1	28285910	28286222	515	XKR8
1	28306875	28307342	516	XKR8
1	28307630	28307962	517	XKR8
1	28351877	28352156	518	EYA3
1	28359276	28359619	519	EYA3
1	28415251	28415397	520	EYA3
1	28436155	28436479	521	EYA3
1	28477880	28478126	522	PTAFR
1	28511612	28511829	523	PTAFR
1	28562452	28562620	524	ATPIF1
1	28584797	28584916	525	SESN2
1	28587920	28588051	526	SESN2
1	28607911	28608115	527	SESN2
1	28636363	28636813	528	MED18
1	28648775	28649122	529	MED18
1	28650162	28650297	530	MED18
1	28650378	28650605	531	MED18
1	28760455	28760651	532	PHACTR4
1	28763887	28764343	533	PHACTR4
1	28810277	28810503	534	SNHG3
1	28880751	28881161	535	TRNAU1AP
1	28906354	28906427	536	SNORA61
1	28941863	28941894	537	RAB42
1	28968415	28968610	538	TAF12
1	28969915	28970390	539	TAF12
1	28975248	28975565	540	RNU11
1	28995036	28995274	541	GMEB1
1	28996471	28996670	542	GMEB1
1	29013445	29013607	543	GMEB1
1	29014010	29014249	544	GMEB1
1	29063062	29063357	545	YTHDF2
1	29113877	29114080	546	OPRD1
1	29134567	29134748	547	OPRD1
1	29142425	29142713	548	OPRD1
1	29155616	29155941	549	OPRD1
1	29157248	29157685	550	OPRD1
1	29159912	29160277	551	OPRD1
1	29161837	29162087	552	OPRD1
1	29216962	29217377	553	EPB41
1	29220149	29220214	554	EPB41
1	29224938	29225207	555	EPB41
1	29226185	29226534	556	EPB41
1	29236961	29237099	557	EPB41
1	29246437	29246676	558	EPB41
1	29304678	29305205	559	EPB41
1	29343987	29344324	560	EPB41
1	29351481	29351886	561	TMEM200B
1	29356322	29356665	562	TMEM200B
1	29376693	29377213	563	TMEM200B
1	29380665	29380848	564	TMEM200B
1	29395238	29395541	565	TMEM200B
1	29400431	29400636	566	TMEM200B
1	29410193	29410510	567	TMEM200B
1	29423940	29424318	568	TMEM200B
1	29488610	29488948	569	SRSF4
1	29490812	29490977	570	SRSF4
1	29502823	29503214	571	SRSF4
1	29506507	29506637	572	SRSF4
1	29536774	29537579	573	MECR
1	29538050	29538119	574	MECR
1	29780029	29780196	575	LOC101928460
1	29841587	29841838	576	LOC101928460
1	30279552	30279823	577	LOC101929406
1	31217294	31217523	578	LAPTM5
1	31478137	31478316	579	SNORD103C
1	31484600	31484886	580	SNORD103C
1	31485581	31485782	581	SNORD103C
1	31598892	31599112	582	PUM1
1	31635659	31635830	583	NKAIN1
1	31664278	31664631	584	NKAIN1
1	31745308	31745622	585	SNRNP40
1	31966475	31966936	586	LINC01225
1	31997032	31997286	587	LINC01226
1	32135634	32135782	588	PEF1
1	32261825	32262025	589	SPOCD1
1	32264283	32264574	590	SPOCD1
1	32390815	32390972	591	PTP4A2
1	32398922	32399049	592	PTP4A2
1	32400973	32401269	593	PTP4A2
1	32408218	32408417	594	PTP4A2
1	32432690	32433026	595	PTP4A2
1	32497932	32498252	596	KHDRBS1
1	32529076	32529274	597	TMEM39B
1	32565065	32565243	598	KPNA6
1	32573584	32573640	599	KPNA6
1	32615532	32615736	600	TXLNA
1	32616689	32617045	601	TXLNA
1	32687943	32688058	602	TMEM234
1	32730630	32730759	603	LCK
1	32777730	32777916	604	HDAC1
1	32870423	32870612	605	BSDC1
1	32920390	32920644	606	ZBTB8B
1	32936096	32936224	607	ZBTB8B
1	32959403	32959585	608	ZBTB8B
1	32964339	32964611	609	ZBTB8B
1	32977293	32977574	610	ZBTB8A
1	32986111	32986342	611	ZBTB8A
1	33010832	33011269	612	ZBTB8A
1	33036009	33036212	613	ZBTB8A
1	33116008	33116256	614	ZBTB8OS
1	33147715	33147990	615	SYNC
1	33151338	33151530	616	SYNC
1	33202415	33202713	617	KIAA1522
1	33209515	33209809	618	KIAA1522
1	33269472	33269624	619	S100PBP
1	33307411	33307548	620	S100PBP
1	33395031	33395265	621	TMEM54
1	33399086	33399273	622	RNF19B
1	33436731	33437004	623	RNF19B
1	33450820	33450983	624	RNF19B
1	33480530	33480704	625	AK2
1	33500640	33500871	626	AK2
1	33592912	33593095	627	AZIN2
1	33686739	33686959	628	ZNF362
1	33694786	33695018	629	ZNF362
1	33798106	33798344	630	A3GALT2
1	33804003	33804378	631	PHC2
1	33807923	33808175	632	PHC2
1	33809040	33809434	633	PHC2
1	33814053	33814378	634	PHC2
1	33823519	33824390	635	LOC101929464
1	33875706	33875918	636	PHC2
1	33876122	33876371	637	PHC2
1	33892507	33893049	638	ZSCAN20
1	33893531	33894646	639	ZSCAN20
1	33900277	33900619	640	ZSCAN20
1	33902687	33903075	641	ZSCAN20
1	33907937	33907991	642	ZSCAN20
1	34414699	34414887	643	CSMD2-AS1
1	34463601	34463783	644	CSMD2-AS1
1	34464605	34464907	645	CSMD2-AS1
1	35099122	35099152	646	GJB5
1	35270171	35270441	647	GJA4
1	35340241	35340386	648	SMIM12
1	35449743	35449891	649	TMEM35B
1	35497440	35497688	650	ZMYM6
1	35526761	35527029	651	ZMYM1
1	35734150	35734465	652	ZMYM4
1	35742258	35742678	653	ZMYM4
1	35925505	35925748	654	KIAA0319L
1	35934932	35935132	655	KIAA0319L
1	35965447	35965695	656	KIAA0319L
1	36102916	36103375	657	PSMB2
1	36134237	36134401	658	PSMB2
1	36173382	36173574	659	C1orf216
1	36193158	36193543	660	C1orf216
1	36243008	36243277	661	CLSPN
1	36448600	36449094	662	AGO3
1	36458897	36459087	663	AGO3
1	36459827	36459938	664	AGO3
1	36461018	36461350	665	AGO3
1	36461479	36461863	666	AGO3
1	36463162	36463388	667	AGO3
1	36464542	36464681	668	AGO3
1	36615151	36615332	669	TRAPPC3
1	36616760	36616862	670	TRAPPC3
1	36627015	36627256	671	TRAPPC3
1	36669585	36669737	672	THRAP3
1	36674730	36675218	673	THRAP3
1	36677523	36677856	674	THRAP3
1	36680108	36680251	675	THRAP3
1	36685431	36685466	676	THRAP3
1	36702111	36702321	677	THRAP3
1	36706008	36706162	678	THRAP3
1	36839142	36839296	679	STK40
1	36929874	36930129	680	MRPS15
1	36941899	36942203	681	CSF3R
1	37002081	37002218	682	CSF3R
1	37022938	37023216	683	CSF3R
1	37065457	37065699	684	CSF3R
1	37138902	37139116	685	CSF3R
1	37175735	37175928	686	CSF3R
1	37176606	37176940	687	CSF3R
1	37181738	37182037	688	CSF3R
1	37183896	37184330	689	CSF3R
1	37214203	37214412	690	CSF3R
1	37230292	37230700	691	GRIK3
1	37236037	37236324	692	GRIK3
1	37238826	37239050	693	GRIK3
1	37242579	37242838	694	GRIK3
1	37243095	37243360	695	GRIK3
1	37246794	37247016	696	GRIK3
1	37248274	37248518	697	GRIK3
1	37254444	37254651	698	GRIK3
1	37316684	37317071	699	GRIK3
1	37333854	37334296	700	GRIK3
1	37337251	37337418	701	GRIK3
1	37389978	37390166	702	GRIK3
1	37428746	37428930	703	GRIK3
1	37430427	37430726	704	GRIK3
1	37431447	37431658	705	GRIK3
1	37461758	37462033	706	GRIK3
1	37474676	37474930	707	GRIK3
1	37497547	37497791	708	GRIK3
1	37535731	37536164	709	GRIK3
1	37538830	37539137	710	GRIK3
1	37539415	37539578	711	GRIK3
1	37789255	37789555	712	LINC01137
1	37804413	37804566	713	LINC01137
1	37806274	37806468	714	LINC01137
1	37830558	37830874	715	LINC01137
1	37980806	37981010	716	MEAF6
1	37990258	37990748	717	MEAF6
1	38011833	38012086	718	SNIP1
1	38019823	38020020	719	SNIP1
1	38094803	38095147	720	RSPO1
1	38216046	38216240	721	EPHA10
1	38411609	38411870	722	INPP5B
1	38477949	38478416	723	UTP11
1	38485568	38485845	724	UTP11
1	38518162	38518474	725	POU3F1
1	38604328	38604486	726	LINC01343
1	38657489	38657897	727	LINC01343
1	38658714	38658996	728	LINC01343
1	38689313	38689631	729	LINC01343
1	38693770	38693994	730	LINC01343
1	38736637	38736859	731	LINC01343
1	38751558	38751948	732	LINC01343
1	38752256	38752443	733	LINC01343
1	38819436	38819809	734	LINC01343
1	38839230	38839373	735	LINC01343
1	38910162	38910344	736	LINC01343
1	38912481	38912678	737	LINC01343
1	38921869	38922073	738	LINC01343
1	38934194	38934498	739	LINC01343
1	39224362	39224577	740	RRAGC
1	39231472	39231641	741	RRAGC
1	39233495	39233887	742	RRAGC
1	39237838	39237989	743	RRAGC
1	39241144	39241620	744	RRAGC
1	39244009	39244431	745	RRAGC
1	39265597	39265922	746	RRAGC
1	39278773	39279033	747	RRAGC
1	39321739	39322219	748	RRAGC
1	39434847	39435097	749	AKIRIN1
1	39456145	39456381	750	AKIRIN1
1	39462414	39462615	751	AKIRIN1
1	39462915	39463613	752	AKIRIN1
1	39465775	39466041	753	AKIRIN1
1	39514684	39514968	754	NDUFS5
1	39539385	39539897	755	MACF1
1	39568234	39568459	756	MACF1
1	39576370	39576615	757	MACF1
1	39592967	39593256	758	MACF1
1	39605436	39605683	759	MACF1
1	39615393	39615579	760	MACF1
1	39624117	39624407	761	MACF1
1	39626870	39627019	762	MACF1
1	39636363	39636742	763	MACF1
1	39636994	39637252	764	MACF1
1	39639944	39640031	765	MACF1
1	39645149	39645245	766	MACF1
1	39648668	39648924	767	MACF1
1	39649442	39649713	768	MACF1
1	39659111	39659450	769	MACF1
1	39679433	39679643	770	MACF1
1	39691646	39692006	771	MACF1
1	39701628	39701879	772	MACF1
1	39704326	39704557	773	MACF1
1	39707486	39707800	774	MACF1
1	39724284	39724470	775	KIAA0754
1	39732046	39732289	776	KIAA0754
1	39735789	39736121	777	KIAA0754
1	39758912	39759287	778	KIAA0754
1	39860906	39861285	779	KIAA0754
1	39872603	39872838	780	KIAA0754
1	39890920	39891246	781	KIAA0754
1	40028527	40028947	782	LOC101929516
1	40038121	40038765	783	PABPC4
1	40071931	40072217	784	PABPC4
1	40140821	40141107	785	NT5C1A
1	40174246	40174530	786	HPCAL4
1	40199820	40200247	787	PPIE
1	40294726	40295159	788	LOC101929536
1	40302201	40302436	789	TRIT1
1	40308494	40308755	790	TRIT1
1	40311241	40311536	791	TRIT1
1	40325315	40325566	792	TRIT1
1	40358896	40359153	793	MYCL
1	40496235	40496548	794	CAP1
1	40497833	40498136	795	CAP1
1	40502014	40502226	796	CAP1
1	40504931	40505099	797	CAP1
1	40512648	40513000	798	CAP1
1	40515657	40516077	799	CAP1
1	40552553	40552799	800	PPT1
1	40669332	40669507	801	RLF
1	40754873	40755086	802	COL9A2
1	40880124	40880392	803	SMAP2
1	41032481	41032791	804	ZNF684
1	41167223	41167668	805	NFYC
1	41174844	41175016	806	NFYC
1	41206274	41206664	807	NFYC
1	41210560	41210714	808	NFYC
1	41227245	41227399	809	KCNQ4
1	41230762	41230980	810	KCNQ4
1	41231350	41231674	811	KCNQ4
1	41231829	41232034	812	KCNQ4
1	41238349	41238507	813	KCNQ4
1	41261540	41261712	814	KCNQ4
1	41319488	41319699	815	CITED4
1	41322394	41322808	816	CITED4
1	41323429	41323773	817	CITED4
1	41462811	41463078	818	CTPS1
1	41469515	41469689	819	SLFNL1-AS1
1	41616746	41616915	820	SCMH1
1	41658526	41658804	821	SCMH1
1	41658994	41659510	822	SCMH1
1	41659589	41659913	823	SCMH1
1	41686423	41686832	824	SCMH1
1	41688174	41688467	825	SCMH1
1	41688552	41688995	826	SCMH1
1	41689242	41689619	827	SCMH1
1	41689881	41690199	828	SCMH1
1	41708855	41709063	829	SCMH1
1	41750268	41750527	830	SCMH1
1	41756996	41757207	831	SCMH1
1	41780683	41781112	832	FOXO6
1	41793029	41793800	833	FOXO6
1	41796000	41796229	834	FOXO6
1	41806978	41807191	835	FOXO6
1	41810876	41811112	836	FOXO6
1	41837578	41837818	837	LOC101929901
1	41846665	41846973	838	LOC101929901
1	41853554	41853607	839	LOC101929901
1	41875841	41876015	840	LOC101929901
1	41903780	41904075	841	EDN2
1	41924060	41924268	842	EDN2
1	41948945	41949417	843	EDN2
1	41969701	41970016	844	EDN2
1	42142885	42143052	845	EDN2
1	42255513	42255738	846	HIVEP3
1	42319164	42319339	847	HIVEP3
1	42327343	42327567	848	HIVEP3
1	42329497	42329679	849	HIVEP3
1	42330464	42330753	850	HIVEP3
1	42418922	42419226	851	HIVEP3
1	42462585	42462810	852	HIVEP3
1	42643198	42643265	853	GUCA2A
1	42657521	42657694	854	GUCA2A
1	42674902	42675065	855	GUCA2A
1	42675330	42675573	856	GUCA2A
1	42680345	42680762	857	GUCA2A
1	42692320	42692675	858	GUCA2A
1	42724198	42724794	859	FOXJ3
1	42725082	42725663	860	FOXJ3
1	42726530	42726898	861	FOXJ3
1	42747961	42748284	862	FOXJ3
1	42810043	42810212	863	FOXJ3
1	42859305	42859470	864	RIMKLA
1	42867798	42868079	865	RIMKLA
1	42885109	42885611	866	ZMYND12
1	42886492	42887322	867	ZMYND12
1	42888928	42889212	868	ZMYND12
1	42897756	42897961	869	ZMYND12
1	42924220	42924444	870	PPCS
1	42926313	42926599	871	PPCS
1	43078357	43078639	872	PPIH
1	43104722	43104999	873	PPIH
1	43105471	43105540	874	PPIH
1	43109924	43110406	875	PPIH
1	43121618	43121995	876	PPIH
1	43125608	43125851	877	PPIH
1	43147805	43148145	878	YBX1
1	43206514	43206765	879	CLDN19
1	43208466	43208721	880	CLDN19
1	43211575	43211884	881	CLDN19
1	43253762	43254082	882	LOC100129924
1	43261572	43262070	883	LOC100129924
1	43273248	43273659	884	ERMAP
1	43303818	43303996	885	ZNF691
1	43312083	43312284	886	ZNF691
1	43318714	43319163	887	LOC339539
1	43374867	43375117	888	SLC2A1-AS1
1	43419389	43419543	889	SLC2A1-AS1
1	43447153	43447490	890	SLC2A1
1	43447622	43447891	891	SLC2A1
1	43480299	43480540	892	SLC2A1
1	43514521	43515081	893	SLC2A1
1	43515340	43515572	894	SLC2A1
1	43548106	43548886	895	FAM183A
1	43595021	43595322	896	FAM183A
1	43628412	43628722	897	EBNA1BP2
1	43854873	43855236	898	MED8
1	43902366	43902626	899	HYI
1	43933244	43933455	900	HYI
1	43984686	43985014	901	PTPRF
1	43986029	43986600	902	PTPRF
1	44117729	44117928	903	KDM4A
1	44174243	44174423	904	ST3GAL3
1	44182032	44182214	905	ST3GAL3
1	44182564	44182969	906	ST3GAL3
1	44185568	44185807	907	LOC101929592
1	44186262	44186436	908	LOC101929592
1	44213869	44214158	909	LOC101929592
1	44229252	44229412	910	LOC101929592
1	44265376	44265675	911	LOC101929592
1	44277475	44277856	912	LOC101929592
1	44278768	44278956	913	LOC101929592
1	44334450	44334654	914	ARTN
1	44378884	44379236	915	ARTN
1	44417192	44417418	916	IPO13
1	44418381	44418738	917	IPO13
1	44480227	44480446	918	SLC6A9
1	44492976	44493271	919	SLC6A9
1	44501560	44502315	920	SLC6A9
1	44509416	44509783	921	SLC6A9
1	44523598	44523901	922	SLC6A9
1	44529478	44529634	923	SLC6A9
1	44546732	44547146	924	KLF17
1	44549798	44550130	925	KLF17
1	44574833	44575175	926	KLF17
1	44579763	44580098	927	KLF17
1	44619750	44620142	928	KLF17
1	44685402	44685564	929	DMAP1
1	44691160	44691321	930	DMAP1
1	44701499	44701808	931	ERI3-IT1
1	44718176	44718338	932	SNORA110
1	44722830	44722998	933	SNORA110
1	44726916	44727236	934	SNORA110
1	44732165	44732331	935	SNORA110
1	44774033	44774292	936	ERI3
1	44780086	44780282	937	ERI3
1	44780637	44780797	938	ERI3
1	44781229	44782482	939	ERI3
1	44782720	44783074	940	ERI3
1	44784038	44784272	941	ERI3
1	44793546	44793823	942	ERI3
1	44802438	44802571	943	ERI3
1	44802755	44803034	944	ERI3
1	44817163	44817454	945	ERI3
1	44828541	44828638	946	ERI3
1	44845686	44845980	947	ERI3
1	44853826	44854138	948	RNF220
1	44886369	44886573	949	RNF220
1	44886645	44886646	950	RNF220
1	44886697	44887215	951	RNF220
1	44894310	44894594	952	RNF220
1	44902270	44902532	953	RNF220
1	44978188	44978483	954	RNF220
1	44990389	44990588	955	RNF220
1	45008153	45008281	956	RNF220
1	45018436	45018700	957	TMEM53
1	45135081	45135416	958	TMEM53
1	45196302	45196613	959	KIF2C
1	45196749	45196946	960	KIF2C
1	45205354	45205597	961	KIF2C
1	45238603	45238791	962	RPS8
1	45258771	45258989	963	BEST4
1	45301649	45301958	964	PTCH2
1	45328816	45329073	965	PTCH2
1	45371220	45371495	966	PTCH2
1	45400450	45400846	967	EIF2B3
1	45402743	45403024	968	EIF2B3
1	45404757	45404976	969	EIF2B3
1	45406012	45406257	970	EIF2B3
1	45413214	45413388	971	EIF2B3
1	45413739	45413979	972	EIF2B3
1	45428476	45428725	973	EIF2B3
1	45464879	45465300	974	HECTD3
1	45480229	45480419	975	UROD
1	45518715	45519292	976	UROD
1	45543598	45543863	977	UROD
1	45800573	45800832	978	TOE1
1	45800885	45800892	979	TOE1
1	45805151	45805318	980	TOE1
1	45839543	45840249	981	MUTYH
1	45865603	45865911	982	MUTYH
1	45978390	45978876	983	PRDX1
1	45979236	45979478	984	PRDX1
1	45984486	45984836	985	PRDX1
1	45987920	45987946	986	PRDX1
1	45995192	45995646	987	PRDX1
1	45996339	45996455	988	PRDX1
1	46036358	46036601	989	NASP
1	46048922	46049197	990	NASP
1	46065647	46065869	991	NASP
1	46131568	46131889	992	RPS15AP10
1	46139802	46139969	993	GPBP1L1
1	46224522	46224837	994	IPP
1	46262622	46263170	995	MAST2
1	46263633	46264034	996	MAST2
1	46279582	46279716	997	MAST2
1	46293051	46293310	998	MAST2
1	46307752	46307875	999	MAST2
1	46307957	46308189	1000	MAST2
1	46328945	46329297	1001	MAST2
1	46347244	46347526	1002	MAST2
1	46389105	46389266	1003	MAST2
1	46393270	46393559	1004	MAST2
1	46411056	46411483	1005	MAST2
1	46427129	46427272	1006	MAST2
1	46510621	46511008	1007	PIK3R3
1	46528466	46529171	1008	PIK3R3
1	46529413	46529753	1009	PIK3R3
1	46562232	46562330	1010	PIK3R3
1	46562707	46563034	1011	PIK3R3
1	46600786	46601495	1012	LOC101929626
1	46648642	46649000	1013	PIK3R3
1	46769253	46769420	1014	UQCRH
1	46771627	46771896	1015	UQCRH
1	46773475	46773851	1016	UQCRH
1	46774130	46774401	1017	UQCRH
1	46774531	46774743	1018	UQCRH
1	46786062	46786253	1019	UQCRH
1	46799184	46799352	1020	NSUN4
1	46827915	46828388	1021	NSUN4
1	46828688	46829092	1022	NSUN4
1	46839309	46839518	1023	FAAH
1	46908104	46908392	1024	LINC01398
1	46924568	46924961	1025	LINC01398
1	46926937	46927167	1026	LINC01398
1	46929712	46930121	1027	LINC01398
1	46932197	46932621	1028	LINC01398
1	46944362	46944533	1029	DMBX1
1	46945530	46945800	1030	DMBX1
1	46968602	46968740	1031	DMBX1
1	46985673	46985926	1032	DMBX1
1	46988007	46988312	1033	DMBX1
1	46990995	46991317	1034	MKNK1-AS1
1	46991938	46992161	1035	MKNK1-AS1
1	47129936	47130267	1036	ATPAF1
1	47152857	47153232	1037	EFCAB14-AS1
1	47153831	47153995	1038	EFCAB14-AS1
1	47190995	47191159	1039	EFCAB14
1	47233683	47233957	1040	CYP4B1
1	47321987	47322265	1041	CYP4Z2P
1	47369935	47370092	1042	CYP4Z2P
1	47456916	47457178	1043	CYP4X1
1	47574876	47575617	1044	CYP4A22
1	47779981	47780191	1045	STIL
1	47789497	47789714	1046	STIL
1	47865497	47865831	1047	FOXE3
1	47873186	47873468	1048	FOXE3
1	47957112	47957403	1049	LINC01389
1	48271719	48272034	1050	TRABD2B
1	48331523	48331801	1051	TRABD2B
1	48332948	48333337	1052	TRABD2B
1	48340628	48341038	1053	TRABD2B
1	48356715	48356902	1054	TRABD2B
1	48391054	48391505	1055	TRABD2B
1	48467932	48468056	1056	TRABD2B
1	48539694	48539891	1057	TRABD2B
1	48542545	48542917	1058	TRABD2B
1	48558898	48559175	1059	SKINT1L
1	48662169	48662377	1060	SKINT1L
1	48774622	48774822	1061	SLC5A9
1	48928455	48928665	1062	SPATA6
1	48966056	48966346	1063	SPATA6
1	48966606	48967098	1064	SPATA6
1	48971820	48972192	1065	SPATA6
1	48991811	48992818	1066	SPATA6
1	49006234	49006443	1067	SPATA6
1	49076660	49076944	1068	SPATA6
1	49085413	49085661	1069	SPATA6
1	49127768	49127917	1070	BEND5
1	49386542	49386754	1071	BEND5
1	49393836	49393988	1072	BEND5
1	49395670	49396037	1073	BEND5
1	49396266	49396391	1074	BEND5
1	49506785	49507073	1075	LOC101929721
1	49510132	49510503	1076	LOC101929721
1	49514426	49514637	1077	LOC101929721
1	49517345	49517859	1078	LOC101929721
1	49559940	49560107	1079	LOC101929721
1	49675245	49675397	1080	LOC101929721
1	49807205	49807370	1081	LOC101929721
1	49810032	49810282	1082	LOC101929721
1	49817658	49817898	1083	LOC101929721
1	49830389	49830488	1084	AGBL4-IT1
1	49877882	49878270	1085	AGBL4-IT1
1	50051079	50051366	1086	AGBL4-IT1
1	50501918	50502199	1087	ELAVL4
1	50623006	50623329	1088	ELAVL4
1	50623571	50623766	1089	ELAVL4
1	50637202	50637372	1090	ELAVL4
1	50677166	50677362	1091	ELAVL4
1	50771593	50771799	1092	DMRTA2
1	50916993	50917291	1093	DMRTA2
1	50918340	50918565	1094	DMRTA2
1	50938334	50938580	1095	DMRTA2
1	50976219	50976395	1096	DMRTA2
1	50996775	50997101	1097	DMRTA2
1	51025828	51026112	1098	DMRTA2
1	51027938	51028106	1099	DMRTA2
1	51029685	51029912	1100	DMRTA2
1	51035703	51036005	1101	DMRTA2
1	51043603	51043929	1102	DMRTA2
1	51044694	51044927	1103	DMRTA2
1	51045933	51046220	1104	DMRTA2
1	51071208	51071428	1105	DMRTA2
1	51159200	51159534	1106	FAF1
1	51165959	51166297	1107	FAF1
1	51167242	51167731	1108	FAF1
1	51167828	51168038	1109	FAF1
1	51249015	51249424	1110	FAF1
1	51254679	51255068	1111	FAF1
1	51256986	51257269	1112	FAF1
1	51294686	51294790	1113	FAF1
1	51295108	51295353	1114	FAF1
1	51300304	51300550	1115	FAF1
1	51570288	51570499	1116	C1orf185
1	51657992	51658148	1117	RNF11
1	51701205	51701485	1118	RNF11
1	51736461	51736853	1119	TTC39A
1	51972474	51972785	1120	EPS15
1	52192730	52192992	1121	OSBPL9
1	52239066	52239258	1122	OSBPL9
1	52382421	52382677	1123	NRDC
1	52432210	52432429	1124	RAB3B
1	52503204	52503502	1125	KTI12
1	52542297	52542553	1126	BTF3L4
1	52870197	52870338	1127	PRPF38A
1	52910145	52910309	1128	PRPF38A
1	52945690	52946011	1129	ZCCHC11
1	53060858	53061263	1130	GPX7
1	53071142	53071509	1131	GPX7
1	53140392	53140680	1132	COA7
1	53498323	53498506	1133	SCP2
1	53514868	53515121	1134	PODN
1	53517424	53517584	1135	PODN
1	53554763	53554889	1136	PODN
1	53574908	53575111	1137	SLC1A7
1	53581585	53581936	1138	SLC1A7
1	53582039	53582396	1139	SLC1A7
1	53585595	53585867	1140	SLC1A7
1	53598960	53599231	1141	SLC1A7
1	53600629	53600945	1142	SLC1A7
1	53601164	53601395	1143	SLC1A7
1	53605572	53606050	1144	SLC1A7
1	53608175	53608572	1145	SLC1A7
1	53609236	53609453	1146	SLC1A7
1	53611892	53612221	1147	SLC1A7
1	53647792	53647963	1148	CPT2
1	53648882	53649010	1149	CPT2
1	53715398	53715581	1150	MAGOH
1	53726427	53726619	1151	MAGOH
1	53748681	53748911	1152	MAGOH
1	53754741	53754966	1153	LRP8
1	53774234	53774567	1154	LRP8
1	53787771	53788009	1155	LRP8
1	53790847	53791105	1156	LRP8
1	53801643	53801966	1157	LOC105378732
1	53825959	53826281	1158	LOC105378732
1	53828038	53828218	1159	LOC105378732
1	53878690	53878884	1160	SLC25A3P1
1	53928640	53928930	1161	DMRTB1
1	53953849	53954027	1162	DMRTB1
1	53954209	53954388	1163	DMRTB1
1	53977570	53977814	1164	DMRTB1
1	53987746	53987909	1165	DMRTB1
1	54038173	54038438	1166	DMRTB1
1	54273415	54274055	1167	NDC1
1	54395096	54395314	1168	HSPB11
1	54422253	54422900	1169	LRRC42
1	54503270	54503416	1170	TMEM59
1	54535830	54536018	1171	TMEM59
1	54576791	54577162	1172	CDCP2
1	54619550	54619889	1173	CDCP2
1	54646293	54646794	1174	CYB5RL
1	54666575	54666746	1175	MRPL37
1	54666796	54667218	1176	MRPL37
1	54668159	54668447	1177	MRPL37
1	54711858	54712076	1178	SSBP3-AS1
1	54722232	54722542	1179	SSBP3-AS1
1	54752880	54753102	1180	SSBP3-AS1
1	54755154	54755596	1181	SSBP3-AS1
1	54756350	54756811	1182	SSBP3-AS1
1	54762416	54762792	1183	SSBP3-AS1
1	54763504	54764129	1184	SSBP3-AS1
1	54766112	54766445	1185	SSBP3-AS1
1	54779608	54779943	1186	SSBP3-AS1
1	54780362	54780815	1187	SSBP3-AS1
1	54783955	54784344	1188	SSBP3-AS1
1	54789544	54790052	1189	SSBP3
1	54791119	54791927	1190	SSBP3
1	54792363	54792625	1191	SSBP3
1	54793025	54793166	1192	SSBP3
1	54801419	54801750	1193	SSBP3
1	54804790	54805284	1194	SSBP3
1	54806646	54806871	1195	SSBP3
1	54811306	54811471	1196	SSBP3
1	54816044	54816386	1197	SSBP3
1	54824384	54824739	1198	SSBP3
1	54828339	54828606	1199	SSBP3
1	54836237	54836465	1200	SSBP3
1	54843810	54844100	1201	SSBP3
1	54873268	54873525	1202	SSBP3
1	55025349	55025643	1203	ACOT11
1	55036605	55036813	1204	ACOT11
1	55037105	55037324	1205	ACOT11
1	55089499	55089753	1206	FAM151A
1	55102019	55102709	1207	MROH7
1	55102778	55102794	1208	MROH7
1	55118093	55118397	1209	MROH7
1	55132283	55132636	1210	MROH7
1	55236829	55237301	1211	PARS2
1	55240690	55240705	1212	PARS2
1	55241942	55242303	1213	PARS2
1	55244598	55244830	1214	PARS2
1	55388521	55388674	1215	DHCR24
1	55391772	55392027	1216	DHCR24
1	55393145	55393547	1217	DHCR24
1	55394124	55394502	1218	DHCR24
1	55410815	55411007	1219	TMEM61
1	55448519	55448837	1220	TMEM61
1	55449826	55450054	1221	TMEM61
1	55514600	55514893	1222	PCSK9
1	55515684	55515853	1223	PCSK9
1	55530778	55530994	1224	PCSK9
1	55543586	55543803	1225	PCSK9
1	55627336	55627597	1226	USP24
1	55675042	55675222	1227	USP24
1	55694892	55695266	1228	LOC100507634
1	55753238	55753570	1229	LOC100507634
1	55757939	55758164	1230	LOC100507634
1	55778149	55778546	1231	LOC100507634
1	55798812	55799095	1232	LOC100507634
1	55945745	55946008	1233	LOC100507634
1	55980402	55980571	1234	LOC100507634
1	55992264	55992843	1235	LOC100507634
1	56013159	56013764	1236	LOC100507634
1	56024454	56024883	1237	LOC100507634
1	56042448	56042700	1238	LOC100507634
1	56053205	56053394	1239	LOC100507634
1	56053916	56054633	1240	LOC100507634
1	56054898	56055241	1241	LOC100507634
1	56157372	56157646	1242	LOC100507634
1	56163348	56163797	1243	LOC100507634
1	56172980	56173217	1244	LOC100507634
1	56185642	56186196	1245	LOC100507634
1	56187937	56188202	1246	LOC100507634
1	56195092	56195537	1247	LOC100507634
1	56214771	56214990	1248	LOC100507634
1	56285232	56285787	1249	LOC100507634
1	56334741	56334942	1250	LOC100507634
1	56386089	56386369	1251	PLPP3
1	56393131	56393334	1252	PLPP3
1	56397202	56397570	1253	PLPP3
1	56418378	56418674	1254	PLPP3
1	56423072	56423156	1255	PLPP3
1	56458898	56459353	1256	PLPP3
1	56462242	56462420	1257	PLPP3
1	56536425	56536617	1258	PLPP3
1	56539860	56540057	1259	PLPP3
1	56589613	56590144	1260	PLPP3
1	56608742	56609102	1261	PLPP3
1	56720399	56720549	1262	PLPP3
1	56806828	56806995	1263	PLPP3
1	56824647	56825005	1264	PLPP3
1	56840004	56840443	1265	PLPP3
1	56841994	56842243	1266	PLPP3
1	56842851	56843073	1267	PLPP3
1	56844045	56844381	1268	PLPP3
1	56855918	56856268	1269	PLPP3
1	56860468	56860782	1270	PLPP3
1	56862129	56862823	1271	PLPP3
1	56890708	56891162	1272	PLPP3
1	56894912	56895316	1273	PLPP3
1	56901763	56901986	1274	PLPP3
1	56905401	56905553	1275	PLPP3
1	56959407	56959598	1276	PLPP3
1	57007135	57007401	1277	PLPP3
1	57010596	57010911	1278	PLPP3
1	57017446	57017779	1279	PLPP3
1	57045269	57045452	1280	PLPP3
1	57057815	57057982	1281	PLPP3
1	57126142	57126429	1282	LOC101929935
1	57134591	57134841	1283	LOC101929935
1	57233712	57234122	1284	C1orf168
1	57253052	57253410	1285	C1orf168
1	57262054	57262447	1286	C1orf168
1	57276949	57277219	1287	C1orf168
1	57323796	57323975	1288	C8A
1	57376788	57377152	1289	C8B
1	57377514	57377808	1290	C8B
1	57386470	57386657	1291	C8B
1	57438879	57439048	1292	C8B
1	57490051	57490286	1293	C8B
1	57502505	57502863	1294	C8B
1	57613077	57613331	1295	C8B
1	57704244	57704404	1296	C8B
1	57717103	57717325	1297	C8B
1	57718408	57718630	1298	C8B
1	57719651	57719831	1299	C8B
1	57735344	57735693	1300	C8B
1	57736592	57736995	1301	C8B
1	57739617	57739914	1302	C8B
1	57740471	57740748	1303	C8B
1	57811473	57811727	1304	C8B
1	57822465	57822801	1305	C8B
1	57905721	57906213	1306	DAB1-AS1
1	57910026	57910426	1307	DAB1-AS1
1	57917661	57917960	1308	DAB1-AS1
1	57939789	57940033	1309	DAB1-AS1
1	57954655	57954887	1310	DAB1-AS1
1	57957796	57958024	1311	DAB1-AS1
1	57986766	57987138	1312	DAB1-AS1
1	57992784	57992918	1313	DAB1-AS1
1	58009835	58010223	1314	DAB1-AS1
1	58043960	58044233	1315	DAB1-AS1
1	58057606	58057797	1316	DAB1-AS1
1	58097763	58097976	1317	DAB1-AS1
1	58099971	58100178	1318	DAB1-AS1
1	58104210	58104377	1319	DAB1-AS1
1	58184537	58184690	1320	DAB1-AS1
1	58221341	58221525	1321	DAB1-AS1
1	58235690	58235968	1322	DAB1-AS1
1	58236409	58236830	1323	DAB1-AS1
1	58258599	58258831	1324	DAB1-AS1
1	58263514	58263808	1325	DAB1-AS1
1	58265206	58265440	1326	DAB1-AS1
1	58265624	58265827	1327	DAB1-AS1
1	58270603	58270921	1328	DAB1-AS1
1	58276707	58276911	1329	DAB1-AS1
1	58363390	58363651	1330	DAB1-AS1
1	58364187	58364635	1331	DAB1-AS1
1	58377540	58377897	1332	DAB1-AS1
1	58381189	58381232	1333	DAB1-AS1
1	58484199	58484476	1334	DAB1-AS1
1	58485327	58486122	1335	DAB1-AS1
1	58488534	58488746	1336	DAB1-AS1
1	58548440	58548658	1337	DAB1
1	58610040	58610315	1338	DAB1
1	58623720	58624057	1339	DAB1
1	58624338	58624488	1340	DAB1
1	58652718	58652882	1341	DAB1
1	58913434	58913704	1342	OMA1
1	58981576	58981868	1343	OMA1
1	59244978	59245380	1344	JUN
1	59256359	59256566	1345	LINC01135
1	59483122	59483382	1346	LINC01358
1	59556836	59557173	1347	HSD52
1	59628976	59629241	1348	HSD52
1	59698483	59698686	1349	FGGY
1	59762502	59762658	1350	FGGY
1	59776685	59776892	1351	FGGY
1	59788807	59789167	1352	FGGY
1	59814719	59814991	1353	FGGY
1	59816291	59816462	1354	FGGY
1	59819146	59819372	1355	FGGY
1	59833128	59833329	1356	FGGY
1	59858856	59859448	1357	FGGY
1	59870608	59871219	1358	FGGY
1	59872984	59873575	1359	FGGY
1	59884783	59885796	1360	FGGY
1	59909139	59909371	1361	FGGY
1	59917496	59917795	1362	FGGY
1	59945216	59945872	1363	FGGY
1	59970079	59970271	1364	FGGY
1	59971206	59971662	1365	FGGY
1	59974214	59974332	1366	FGGY
1	59974893	59975683	1367	FGGY
1	60007754	60007978	1368	FGGY
1	60008713	60009347	1369	FGGY
1	60090903	60091157	1370	FGGY
1	60097182	60097858	1371	FGGY
1	60098089	60098339	1372	FGGY
1	60126186	60126464	1373	LOC101926944
1	60145668	60146074	1374	LOC101926944
1	60156308	60156485	1375	LOC101926944
1	60157107	60157533	1376	LOC101926944
1	60213522	60213771	1377	LOC101926944
1	60310865	60311032	1378	HOOK1
1	60315213	60315432	1379	HOOK1
1	60480488	60480978	1380	C1orf87
1	60482862	60484014	1381	C1orf87
1	60592409	60592580	1382	C1orf87
1	60760984	60761189	1383	C1orf87
1	61055760	61055923	1384	LOC101926964
1	61295699	61295898	1385	LOC101926964
1	61361310	61361793	1386	LOC101926964
1	61378226	61378464	1387	NFIA-AS2
1	61379922	61380079	1388	NFIA-AS2
1	61382703	61382836	1389	NFIA-AS2
1	61386842	61387162	1390	NFIA-AS2
1	61456243	61456623	1391	NFIA-AS2
1	61543646	61543950	1392	NFIA
1	61544881	61545227	1393	NFIA
1	61545724	61545834	1394	NFIA
1	61588664	61588860	1395	NFIA
1	61599941	61600198	1396	NFIA
1	61604989	61605247	1397	NFIA
1	61609428	61609841	1398	NFIA
1	61623429	61624039	1399	NFIA
1	61628406	61628542	1400	NFIA
1	61633401	61633793	1401	NFIA-AS1
1	61690406	61690595	1402	NFIA-AS1
1	61723547	61723740	1403	NFIA-AS1
1	61735397	61735785	1404	NFIA-AS1
1	61747226	61748329	1405	NFIA-AS1
1	61751069	61751264	1406	NFIA-AS1
1	61800574	61800844	1407	NFIA-AS1
1	61835759	61836027	1408	NFIA-AS1
1	61836527	61836921	1409	NFIA-AS1
1	61837768	61838281	1410	NFIA-AS1
1	61869280	61869680	1411	NFIA-AS1
1	61918949	61919191	1412	NFIA-AS1
1	61980503	61980853	1413	MGC34796
1	62028490	62028585	1414	MGC34796
1	62034339	62035140	1415	MGC34796
1	62045151	62045450	1416	MGC34796
1	62141933	62142382	1417	MGC34796
1	62146506	62146812	1418	MGC34796
1	62158225	62158679	1419	TM2D1
1	62165729	62166122	1420	TM2D1
1	62179154	62179514	1421	TM2D1
1	62295203	62295677	1422	PATJ
1	62307852	62308082	1423	PATJ
1	62319500	62319658	1424	PATJ
1	62488237	62488350	1425	L1TD1
1	62490929	62491136	1426	L1TD1
1	62511205	62511642	1427	L1TD1
1	62523384	62523590	1428	L1TD1
1	62605213	62605438	1429	L1TD1
1	62642881	62643047	1430	L1TD1
1	62643374	62643630	1431	L1TD1
1	62657509	62657696	1432	L1TD1
1	62658742	62659014	1433	L1TD1
1	62662048	62662244	1434	L1TD1
1	62664551	62664689	1435	L1TD1
1	62711273	62711454	1436	L1TD1
1	62815582	62815795	1437	KANK4
1	62850286	62850713	1438	USP1
1	62901907	62902261	1439	USP1
1	62916043	62916108	1440	USP1
1	62916231	62916476	1441	USP1
1	63072117	63072330	1442	ANGPTL3
1	63091211	63091614	1443	ANGPTL3
1	63120257	63120551	1444	DOCK7
1	63438393	63438602	1445	ATG4C
1	63635773	63635943	1446	LINC00466
1	63762697	63763106	1447	LINC00466
1	63800638	63800964	1448	FOXD3-AS1
1	63808805	63809036	1449	FOXD3-AS1
1	63817653	63818057	1450	ALG6
1	63833095	63833124	1451	ALG6
1	63839846	63840072	1452	ALG6
1	63870541	63871087	1453	ALG6
1	63881767	63881929	1454	ALG6
1	63918132	63918258	1455	ITGB3BP
1	63934757	63934928	1456	ITGB3BP
1	63978234	63978401	1457	ITGB3BP
1	64082539	64082794	1458	PGM1
1	64157724	64157917	1459	PGM1
1	64159411	64159581	1460	PGM1
1	64257348	64257537	1461	ROR1
1	64272696	64272972	1462	ROR1
1	64288352	64288573	1463	ROR1
1	64300782	64301015	1464	ROR1
1	64309497	64309883	1465	ROR1
1	64334191	64334457	1466	ROR1
1	64365632	64365829	1467	ROR1
1	64370177	64370514	1468	ROR1
1	64394599	64394820	1469	ROR1
1	64446415	64446819	1470	ROR1-AS1
1	64452861	64453186	1471	ROR1-AS1
1	64461192	64461446	1472	ROR1-AS1
1	64462032	64462446	1473	ROR1-AS1
1	64470310	64470592	1474	ROR1-AS1
1	64485226	64485715	1475	ROR1-AS1
1	64512610	64512900	1476	ROR1-AS1
1	64513389	64513687	1477	ROR1-AS1
1	64517523	64517770	1478	ROR1-AS1
1	64517963	64518203	1479	ROR1-AS1
1	64539523	64539647	1480	ROR1-AS1
1	64540576	64540853	1481	ROR1-AS1
1	64557019	64557137	1482	ROR1-AS1
1	64559466	64559562	1483	ROR1-AS1
1	64564306	64564451	1484	ROR1-AS1
1	64600924	64601119	1485	ROR1-AS1
1	64712088	64712247	1486	UBE2U
1	64746143	64746352	1487	UBE2U
1	64901062	64901238	1488	CACHD1
1	64954517	64954815	1489	CACHD1
1	64959334	64959591	1490	CACHD1
1	64959730	64959995	1491	CACHD1
1	64972014	64972340	1492	CACHD1
1	64974995	64975248	1493	CACHD1
1	65089425	65089714	1494	CACHD1
1	65107895	65108075	1495	RAVER2
1	65115721	65115888	1496	RAVER2
1	65120073	65120512	1497	RAVER2
1	65122396	65122934	1498	RAVER2
1	65127455	65128201	1499	RAVER2
1	65146998	65147178	1500	RAVER2
1	65153828	65154142	1501	RAVER2
1	65211670	65211929	1502	RAVER2
1	65250491	65250882	1503	RAVER2
1	65440186	65440369	1504	JAK1
1	65460713	65461324	1505	LINC01359
1	65495569	65495967	1506	LINC01359
1	65511370	65511836	1507	JAK1
1	65533306	65533536	1508	JAK1
1	65575151	65575348	1509	AK4
1	65605562	65605812	1510	AK4
1	65641238	65641672	1511	AK4
1	65644155	65644323	1512	AK4
1	65648496	65648787	1513	AK4
1	65770624	65770832	1514	DNAJC6
1	65810300	65810440	1515	DNAJC6
1	65830679	65830954	1516	LEPROT
1	65833733	65833948	1517	LEPROT
1	65860165	65860499	1518	LEPROT
1	65886825	65886979	1519	LEPROT
1	65889601	65889782	1520	LEPROT
1	66164376	66164569	1521	PDE4B
1	66223293	66223474	1522	PDE4B
1	66385735	66385902	1523	PDE4B
1	66402442	66402701	1524	PDE4B
1	66663579	66663784	1525	PDE4B
1	66736996	66737244	1526	PDE4B
1	66777982	66778558	1527	PDE4B
1	66778822	66779455	1528	PDE4B
1	66781944	66782444	1529	PDE4B
1	66809571	66809746	1530	PDE4B
1	66847303	66847758	1531	PDE4B
1	66854069	66854301	1532	PDE4B
1	66854630	66854921	1533	PDE4B
1	66861828	66862174	1534	PDE4B
1	66864283	66864762	1535	PDE4B
1	66867895	66868154	1536	PDE4B
1	66868529	66869001	1537	PDE4B
1	66871304	66871768	1538	PDE4B
1	66886199	66886460	1539	PDE4B
1	66899214	66899571	1540	PDE4B
1	66912135	66912413	1541	SGIP1
1	66987583	66987916	1542	SGIP1
1	66991476	66992030	1543	SGIP1
1	67042244	67042698	1544	SGIP1
1	67053179	67053411	1545	SGIP1
1	67071760	67072071	1546	SGIP1
1	67072199	67072721	1547	SGIP1
1	67230790	67230971	1548	TCTEX1D1
1	67283495	67283730	1549	INSL5
1	67313649	67314252	1550	INSL5
1	67398574	67398983	1551	MIER1
1	67409550	67409803	1552	MIER1
1	67414091	67414289	1553	MIER1
1	67439183	67439623	1554	MIER1
1	67446816	67447040	1555	MIER1
1	67461849	67462111	1556	SLC35D1
1	67472545	67473047	1557	SLC35D1
1	67491047	67491277	1558	SLC35D1
1	67551111	67551528	1559	SLC35D1
1	67570326	67570559	1560	C1orf141
1	67610104	67610237	1561	C1orf141
1	67614960	67615118	1562	C1orf141
1	67727376	67727588	1563	IL12RB2
1	67753457	67753624	1564	IL12RB2
1	67842527	67842669	1565	SERBP1
1	67871586	67872006	1566	SERBP1
1	67872331	67872548	1567	SERBP1
1	67873703	67873970	1568	SERBP1
1	67908196	67908447	1569	SERBP1
1	67949931	67950115	1570	SERBP1
1	67959940	67960074	1571	SERBP1
1	67960147	67960311	1572	SERBP1
1	67963288	67963630	1573	SERBP1
1	67967508	67967814	1574	SERBP1
1	68112107	68112301	1575	GADD45A
1	68112879	68113092	1576	GADD45A
1	68132301	68132939	1577	GADD45A
1	68143775	68143942	1578	GADD45A
1	68144150	68144799	1579	GADD45A
1	68152404	68152828	1580	GADD45A
1	68232083	68232147	1581	GNG12-AS1
1	68254109	68254451	1582	GNG12-AS1
1	68261193	68261450	1583	GNG12-AS1
1	68287785	68287962	1584	GNG12-AS1
1	68300938	68301274	1585	GNG12
1	68339955	68340437	1586	GNG12
1	68356775	68356944	1587	GNG12
1	68381938	68382138	1588	GNG12
1	68414791	68414954	1589	DIRAS3
1	68422760	68422978	1590	DIRAS3
1	68610890	68611149	1591	WLS
1	68622437	68622712	1592	WLS
1	68623150	68623544	1593	WLS
1	68639792	68640126	1594	WLS
1	68704371	68704712	1595	WLS
1	68758682	68758901	1596	WLS
1	68759816	68760026	1597	WLS
1	68821331	68821494	1598	RPE65
1	68842814	68843073	1599	RPE65
1	68871011	68871306	1600	RPE65
1	68915543	68915976	1601	RPE65
1	68924623	68925259	1602	RPE65
1	68926585	68926793	1603	RPE65
1	68940588	68940853	1604	DEPDC1-AS1
1	69267619	69267742	1605	DEPDC1
1	69279170	69279386	1606	DEPDC1
1	69380609	69380943	1607	DEPDC1
1	69421130	69421287	1608	DEPDC1
1	69444236	69444451	1609	DEPDC1
1	69546878	69547113	1610	DEPDC1
1	69595011	69595551	1611	LRRC7
1	69657020	69657239	1612	LRRC7
1	69741773	69742027	1613	LRRC7
1	69790374	69790549	1614	LRRC7
1	69870969	69871163	1615	LRRC7
1	70038718	70039107	1616	LRRC7
1	70115359	70115709	1617	LRRC7
1	70141815	70142060	1618	LRRC7
1	70365299	70365581	1619	PIN1P1
1	70473914	70474115	1620	PIN1P1
1	70500202	70500372	1621	PIN1P1
1	70535051	70535233	1622	LRRC40
1	70559705	70559820	1623	LRRC40
1	70568878	70569157	1624	LRRC40
1	70582381	70583027	1625	LRRC40
1	70599958	70600319	1626	LRRC40
1	70606181	70606415	1627	LRRC40
1	70618607	70618795	1628	LRRC40
1	70681657	70682042	1629	SRSF11
1	70876597	70876608	1630	CTH
1	70877804	70878143	1631	CTH
1	70878736	70878780	1632	CTH
1	70926774	70927038	1633	CTH
1	70932850	70933034	1634	CTH
1	70948787	70949472	1635	CTH
1	70953726	70954082	1636	CTH
1	70968086	70968283	1637	CTH
1	70970208	70970553	1638	CTH
1	70991807	70991974	1639	CTH
1	71004346	71004602	1640	CTH
1	71115030	71115335	1641	LOC101927244
1	71544559	71544825	1642	ZRANB2
1	71552983	71553288	1643	ZRANB2-AS2
1	71560915	71561161	1644	ZRANB2-AS2
1	71564305	71564930	1645	ZRANB2-AS2
1	71777619	71777687	1646	ZRANB2-AS2
1	71790146	71790521	1647	ZRANB2-AS2
1	71817178	71817506	1648	ZRANB2-AS2
1	71817872	71818147	1649	ZRANB2-AS2
1	71891101	71891332	1650	ZRANB2-AS2
1	71929685	71929875	1651	NEGR1-IT1
1	71941199	71941564	1652	NEGR1-IT1
1	71990225	71990609	1653	NEGR1-IT1
1	72156677	72156848	1654	NEGR1-IT1
1	72161831	72162207	1655	NEGR1-IT1
1	72163382	72163536	1656	NEGR1-IT1
1	72264421	72264677	1657	NEGR1-IT1
1	72451816	72452019	1658	NEGR1-IT1
1	72475145	72475603	1659	NEGR1-IT1
1	72488974	72489431	1660	NEGR1-IT1
1	72498458	72498735	1661	NEGR1-IT1
1	72503605	72503718	1662	NEGR1-IT1
1	72512538	72513016	1663	NEGR1-IT1
1	72524792	72525066	1664	NEGR1-IT1
1	72526030	72526448	1665	NEGR1
1	72577574	72577782	1666	NEGR1
1	72708823	72709126	1667	NEGR1
1	72709574	72709798	1668	NEGR1
1	73111161	73111396	1669	NEGR1
1	73968043	73968295	1670	LINC01360
1	73983154	73983341	1671	LINC01360
1	73983756	73983901	1672	LINC01360
1	74215470	74215778	1673	LINC01360
1	74809038	74809395	1674	TNNI3K
1	74871190	74871492	1675	TNNI3K
1	74893590	74893857	1676	ERICH3-AS1
1	74895353	74895632	1677	ERICH3-AS1
1	74907474	74907640	1678	ERICH3-AS1
1	74922305	74922505	1679	ERICH3-AS1
1	74928537	74928896	1680	ERICH3-AS1
1	74934709	74934912	1681	ERICH3-AS1
1	74971968	74972378	1682	ERICH3-AS1
1	75050872	75051046	1683	ERICH3-AS1
1	75178543	75178912	1684	TYW3
1	75240077	75240364	1685	CRYZ
1	75418473	75418908	1686	LHX8
1	75430125	75430698	1687	LHX8
1	75435294	75435675	1688	LHX8
1	75444263	75444394	1689	LHX8
1	75445903	75446111	1690	LHX8
1	75601484	75601860	1691	LHX8
1	75627878	75628027	1692	LHX8
1	75636273	75636988	1693	LHX8
1	75657338	75657550	1694	LHX8
1	75669453	75669648	1695	LHX8
1	75699211	75699321	1696	LHX8
1	75794208	75794519	1697	LHX8
1	75995263	75995557	1698	SLC44A5
1	76120541	76120959	1699	SLC44A5
1	76228489	76228670	1700	DLSTP1
1	76260167	76260392	1701	MSH4
1	76273010	76273385	1702	MSH4
1	76374355	76374559	1703	ASB17
1	76391140	76391364	1704	ASB17
1	76455897	76456295	1705	LOC101927342
1	76502568	76502852	1706	LOC101927342
1	76503932	76504205	1707	LOC101927342
1	76543699	76544006	1708	ST6GALNAC3
1	76575571	76575810	1709	ST6GALNAC3
1	76605250	76605460	1710	ST6GALNAC3
1	76606438	76606727	1711	ST6GALNAC3
1	76607695	76608087	1712	ST6GALNAC3
1	76608693	76608770	1713	ST6GALNAC3
1	76611505	76612142	1714	ST6GALNAC3
1	76668909	76669163	1715	ST6GALNAC3
1	76712949	76713191	1716	ST6GALNAC3
1	76715917	76716298	1717	ST6GALNAC3
1	76719777	76720143	1718	ST6GALNAC3
1	76757325	76757885	1719	ST6GALNAC3
1	76758568	76758845	1720	ST6GALNAC3
1	76780037	76780322	1721	ST6GALNAC3
1	76793087	76793312	1722	ST6GALNAC3
1	76796779	76797148	1723	ST6GALNAC3
1	76802891	76803064	1724	ST6GALNAC3
1	76806306	76806707	1725	ST6GALNAC3
1	76816401	76816951	1726	ST6GALNAC3
1	76832693	76832895	1727	ST6GALNAC3
1	76907560	76907738	1728	ST6GALNAC3
1	76930142	76930435	1729	ST6GALNAC3
1	76964996	76965205	1730	ST6GALNAC5
1	77053178	77053514	1731	ST6GALNAC5
1	77057734	77058013	1732	ST6GALNAC5
1	77075522	77075765	1733	ST6GALNAC5
1	77078800	77078990	1734	ST6GALNAC5
1	77083195	77083570	1735	ST6GALNAC5
1	77085571	77085728	1736	ST6GALNAC5
1	77086209	77086458	1737	ST6GALNAC5
1	77091658	77091742	1738	ST6GALNAC5
1	77214500	77214780	1739	ST6GALNAC5
1	77227115	77227551	1740	ST6GALNAC5
1	77228997	77229289	1741	ST6GALNAC5
1	77230774	77231213	1742	ST6GALNAC5
1	77235559	77235730	1743	ST6GALNAC5
1	77244083	77244491	1744	ST6GALNAC5
1	77245368	77245547	1745	ST6GALNAC5
1	77263627	77263905	1746	ST6GALNAC5
1	77265531	77265722	1747	ST6GALNAC5
1	77267821	77268116	1748	ST6GALNAC5
1	77270495	77270667	1749	ST6GALNAC5
1	77331225	77332338	1750	ST6GALNAC5
1	77333019	77333203	1751	ST6GALNAC5
1	77339928	77340722	1752	ST6GALNAC5
1	77346165	77346987	1753	ST6GALNAC5
1	77351400	77351632	1754	ST6GALNAC5
1	77399472	77399699	1755	ST6GALNAC5
1	77401460	77401742	1756	ST6GALNAC5
1	77405068	77405194	1757	ST6GALNAC5
1	77482242	77482400	1758	ST6GALNAC5
1	77550971	77551272	1759	PIGK
1	77653599	77653770	1760	PIGK
1	77844902	77845242	1761	AK5
1	77859918	77860313	1762	AK5
1	78093816	78094116	1763	ZZZ3
1	78120816	78120970	1764	ZZZ3
1	78121022	78121267	1765	ZZZ3
1	78192897	78193208	1766	USP33
1	78207759	78208055	1767	USP33
1	78213569	78213809	1768	USP33
1	78215351	78215481	1769	USP33
1	78291560	78291801	1770	MIGA1
1	78305832	78306040	1771	NEXN
1	78442779	78442946	1772	DNAJB4
1	78444739	78444996	1773	DNAJB4
1	78449111	78449466	1774	DNAJB4
1	78465899	78466181	1775	DNAJB4
1	78470481	78470679	1776	DNAJB4
1	78527578	78527898	1777	GIPC2
1	78614027	78614194	1778	MGC27382
1	78636468	78636908	1779	MGC27382
1	78699965	78700632	1780	MGC27382
1	78716834	78717235	1781	MGC27382
1	78745334	78745724	1782	MGC27382
1	78746668	78746906	1783	MGC27382
1	78770282	78770498	1784	MGC27382
1	78949503	78949853	1785	PTGFR
1	79084817	79085114	1786	IFI44L
1	79116410	79116637	1787	IFI44
1	79133689	79133997	1788	IFI44
1	79134140	79134445	1789	IFI44
1	79135197	79136036	1790	IFI44
1	79136094	79136261	1791	IFI44
1	79224390	79224610	1792	IFI44
1	79308863	79309068	1793	ADGRL4
1	79368417	79368584	1794	ADGRL4
1	79733236	79733438	1795	ADGRL4
1	79806310	79806631	1796	ADGRL4
1	79913461	79913637	1797	ADGRL4
1	79999674	80000093	1798	ADGRL4
1	80053871	80054013	1799	ADGRL4
1	80061621	80062092	1800	ADGRL4
1	80064937	80065389	1801	ADGRL4
1	80194084	80194251	1802	ADGRL4
1	80226307	80226511	1803	ADGRL4
1	80227338	80227551	1804	ADGRL4
1	80249642	80249853	1805	LOC101927412
1	80462395	80462576	1806	LOC101927412
1	80463548	80463689	1807	LOC101927412
1	80577088	80577301	1808	LOC101927412
1	80636837	80637042	1809	LOC101927412
1	80637353	80637543	1810	LOC101927412
1	80641008	80641255	1811	LOC101927412
1	80678713	80679003	1812	LOC101927412
1	80851368	80851627	1813	LOC101927412
1	80900880	80901216	1814	LOC101927412
1	80953866	80954454	1815	LOC101927412
1	81096539	81096666	1816	LOC101927412
1	81223172	81223349	1817	LOC101927412
1	81334083	81334272	1818	LOC101927412
1	81382249	81382435	1819	LOC101927412
1	81417252	81417520	1820	LOC101927412
1	81526828	81527031	1821	LOC101927412
1	81624510	81624756	1822	LOC101927434
1	81696768	81696952	1823	LOC101927434
1	81697332	81697609	1824	LOC101927434
1	81698132	81698305	1825	LOC101927434
1	81698476	81698819	1826	LOC101927434
1	81779581	81780319	1827	LOC101927434
1	81796218	81796537	1828	LOC101927434
1	81809143	81809311	1829	LOC101927434
1	81873303	81873464	1830	LOC101927434
1	81943956	81944424	1831	LOC101927434
1	82038778	82038953	1832	LOC101927434
1	82264333	82264719	1833	ADGRL2
1	82266719	82267047	1834	ADGRL2
1	82273070	82273379	1835	ADGRL2
1	82278608	82278766	1836	ADGRL2
1	82279001	82279268	1837	ADGRL2
1	82286469	82286712	1838	ADGRL2
1	82292037	82292303	1839	ADGRL2
1	82420371	82420582	1840	ADGRL2
1	82465876	82466195	1841	ADGRL2
1	82489187	82489431	1842	ADGRL2
1	82691858	82692033	1843	ADGRL2
1	82692854	82692973	1844	ADGRL2
1	82728051	82728315	1845	ADGRL2
1	82752138	82752812	1846	ADGRL2
1	82811372	82811612	1847	ADGRL2
1	82840850	82841082	1848	ADGRL2
1	82930142	82930600	1849	LINC01361
1	82938252	82938515	1850	LINC01361
1	83033078	83033334	1851	LINC01361
1	83108926	83109428	1852	LINC01361
1	83166203	83166342	1853	LINC01361
1	83167123	83167394	1854	LINC01361
1	83228875	83229125	1855	LINC01361
1	83279049	83279378	1856	LINC01361
1	83295446	83295600	1857	LINC01361
1	83348451	83348603	1858	LINC01361
1	83359382	83359593	1859	LINC01361
1	83367139	83367712	1860	LINC01361
1	83542852	83543533	1861	LINC01361
1	83543612	83543783	1862	LINC01361
1	83543848	83544202	1863	LINC01361
1	83568472	83568816	1864	LINC01361
1	83681704	83681940	1865	LINC01361
1	83717796	83717997	1866	LINC01361
1	83726347	83726607	1867	LINC01361
1	83755728	83756019	1868	LINC01361
1	83780462	83780739	1869	LINC01361
1	83918316	83918457	1870	LOC101927560
1	83924429	83924602	1871	LOC101927560
1	83924983	83925469	1872	LOC101927560
1	84040251	84040482	1873	LOC101927560
1	84040576	84041094	1874	LOC101927560
1	84089988	84090436	1875	LOC101927560
1	84091739	84091899	1876	LOC101927560
1	84159198	84159407	1877	LOC101927560
1	84159681	84160127	1878	LOC101927560
1	84160388	84160542	1879	LOC101927560
1	84160843	84161211	1880	LOC101927560
1	84164503	84164714	1881	LOC101927560
1	84199247	84199701	1882	LOC101927560
1	84229279	84229483	1883	LOC101927560
1	84266173	84266341	1884	LOC101927560
1	84284248	84284576	1885	LOC101927560
1	84302680	84303012	1886	LOC101927560
1	84310459	84310705	1887	LOC101927560
1	84311373	84312227	1888	LOC101927560
1	84419942	84420373	1889	TTLL7
1	84425852	84426193	1890	TTLL7
1	84462508	84462698	1891	TTLL7
1	84540933	84541175	1892	PRKACB
1	84549010	84549355	1893	PRKACB
1	84728189	84728283	1894	SAMD13
1	84866934	84867140	1895	DNASE2B
1	84887964	84888252	1896	DNASE2B
1	84944928	84945114	1897	RPF1
1	84958480	84958796	1898	SPATA1
1	84963312	84963868	1899	SPATA1
1	84977667	84977831	1900	GNG5
1	84979145	84979309	1901	GNG5
1	85034660	85035307	1902	CTBS
1	85037233	85037515	1903	CTBS
1	85037687	85037894	1904	CTBS
1	85039535	85039668	1905	CTBS
1	85048958	85049211	1906	CTBS
1	85130466	85131086	1907	SSX2IP
1	85164455	85164629	1908	SSX2IP
1	85167030	85167402	1909	SSX2IP
1	85167901	85168306	1910	SSX2IP
1	85176820	85177090	1911	SSX2IP
1	85219358	85219645	1912	SSX2IP
1	85235446	85235766	1913	SSX2IP
1	85340908	85341243	1914	LPAR3
1	85362083	85362424	1915	LPAR3
1	85465044	85465220	1916	MCOLN2
1	85491809	85492085	1917	MCOLN3
1	85504122	85504289	1918	MCOLN3
1	85520402	85520628	1919	MCOLN3
1	85533169	85533488	1920	WDR63
1	85599510	85599955	1921	SYDE2
1	85603126	85603587	1922	SYDE2
1	85609282	85609649	1923	SYDE2
1	85610246	85610614	1924	SYDE2
1	85661423	85661687	1925	SYDE2
1	85664008	85664081	1926	SYDE2
1	85705868	85706026	1927	C1orf52
1	85709044	85709628	1928	C1orf52
1	85709704	85710086	1929	C1orf52
1	85710890	85711207	1930	C1orf52
1	85725380	85725558	1931	C1orf52
1	85806244	85806438	1932	BCL10
1	85859764	85860064	1933	DDAH1
1	85915183	85915434	1934	DDAH1
1	85961425	85961730	1935	DDAH1
1	86049894	86050116	1936	CYR61
1	86068868	86069131	1937	CYR61
1	86173989	86174138	1938	ZNHIT6
1	86233016	86233442	1939	ZNHIT6
1	86530252	86530559	1940	COL24A1
1	86883078	86883382	1941	CLCA2
1	87186727	87186897	1942	SH3GLB1
1	87186981	87187295	1943	SH3GLB1
1	87207754	87207925	1944	SH3GLB1
1	87214396	87214712	1945	SH3GLB1
1	87239893	87240101	1946	SH3GLB1
1	87381608	87381820	1947	HS2ST1
1	87399410	87399785	1948	HS2ST1
1	87438100	87438329	1949	HS2ST1
1	87456060	87456293	1950	HS2ST1
1	87457303	87457640	1951	HS2ST1
1	87489679	87489980	1952	LINC01140
1	87500376	87500771	1953	LINC01140
1	87577606	87577849	1954	LINC01140
1	87578116	87578271	1955	LINC01140
1	87581291	87581631	1956	LINC01140
1	87643875	87644141	1957	LOC101927844
1	87645160	87645386	1958	LOC101927844
1	87645887	87646062	1959	LOC101927844
1	87654021	87654228	1960	LOC101927844
1	87655039	87655274	1961	LOC101927844
1	87670290	87670492	1962	LOC101927844
1	87671977	87672230	1963	LOC101927844
1	87678564	87678829	1964	LOC101927844
1	87736682	87736914	1965	LMO4
1	87791764	87791922	1966	LMO4
1	87795526	87795863	1967	LMO4
1	87796356	87796658	1968	LMO4
1	87835495	87835701	1969	LINC01364
1	87950010	87950322	1970	LINC01364
1	87976230	87976404	1971	LINC01364
1	88001068	88001423	1972	LINC01364
1	88102878	88103038	1973	LINC01364
1	88108193	88108788	1974	LINC01364
1	88178512	88178725	1975	LINC01364
1	88219389	88219659	1976	LINC01364
1	88283361	88283536	1977	LINC01364
1	88297572	88298014	1978	LINC01364
1	88331064	88331253	1979	LINC01364
1	88363228	88363781	1980	LINC01364
1	88367195	88367675	1981	LINC01364
1	88368857	88369146	1982	LINC01364
1	88370511	88370914	1983	LINC01364
1	88371353	88371634	1984	LINC01364
1	88403621	88403832	1985	LINC01364
1	88415308	88415781	1986	LINC01364
1	88421726	88421985	1987	LINC01364
1	88645474	88645842	1988	PKN2
1	88757664	88758000	1989	PKN2
1	89109253	89109636	1990	PKN2
1	89128213	89128548	1991	PKN2
1	89148302	89148862	1992	PKN2
1	89163237	89163511	1993	PKN2-AS1
1	89295716	89296468	1994	GTF2B
1	89316066	89316687	1995	GTF2B
1	89428821	89429180	1996	KYAT3
1	89530857	89531155	1997	GBP1
1	89920783	89920957	1998	GBP1P1
1	89989570	89989806	1999	LRRC8B
[truncated: 48,763 more rows]
